# Supplementary material for: Comprehensivein silicomodeling of the rice plant PRR Xa21 and its interaction with RaxX21-sY and OsSERK2
Source: Royal Society of Chemistry journal article supplement (doi:10.1039/d0ra01396j), 2020-01-01
Supplement: d0ra01396j1.pdf [file d0ra01396j1.pdf]

ELECTRONIC SUPPLEMENTARY INFORMATION (ESI)

Comprehensive *in silico* modeling of plant PRR Xa21 and its interaction with RaxX21-sY and OsSERK2

M H M Mubassir,<sup>\*a</sup> M Abu Naser,<sup>b</sup> Mohd Firdaus Abdul-Wahab,<sup>b</sup> Tanvir Jawad,<sup>a</sup> Raghieb Ishraq Alvy<sup>a</sup> and Salehuddin Hamdan<sup>\*b</sup>

<sup>a</sup> Department of Mathematics and Natural Sciences, BRAC University, 66 Mohakhali, Dhaka-1212, Bangladesh.

<sup>b</sup> Faculty Bioscience and Medical Engineering, Universiti Teknologi Malaysia, 81310 Johor Bahru, Johor, Malaysia

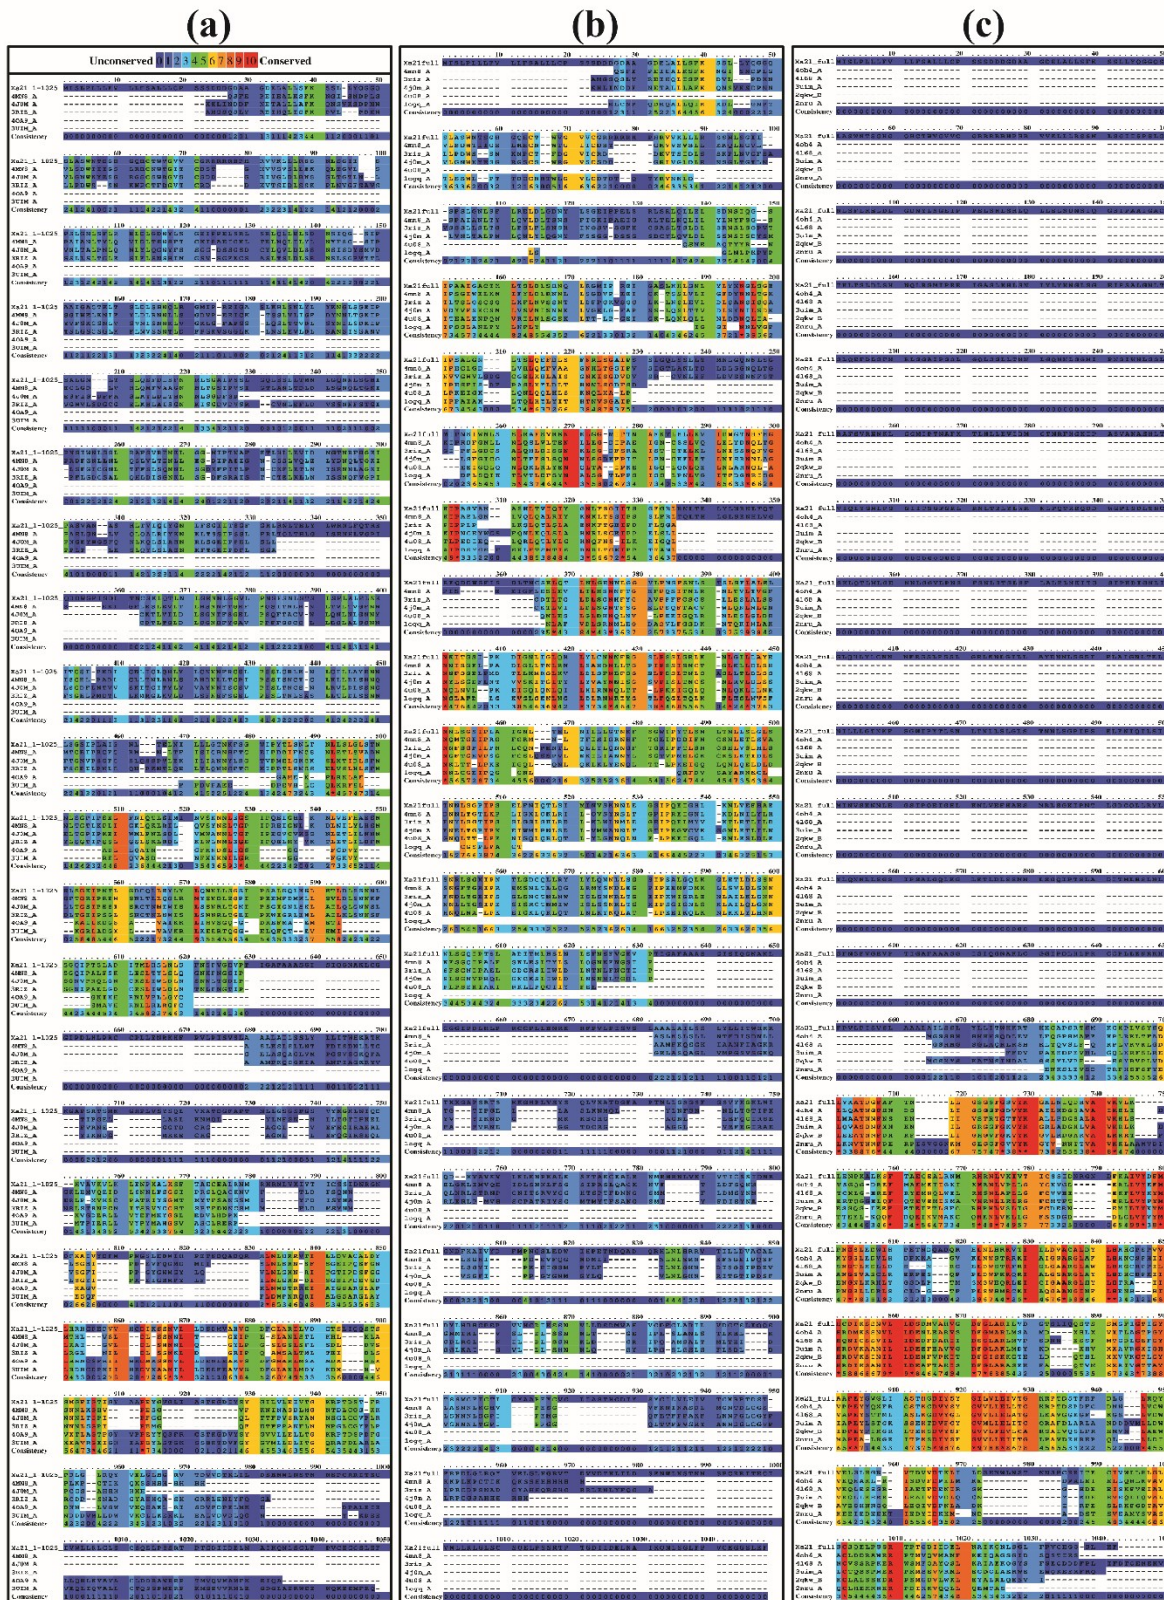

Fig. S1 Multiple sequence alignment (MSA) of Xa21 protein sequence and top five BLASTP results for (a) Full sequence 1-1025 (b) LRR templates (c) JM and Kinase templates

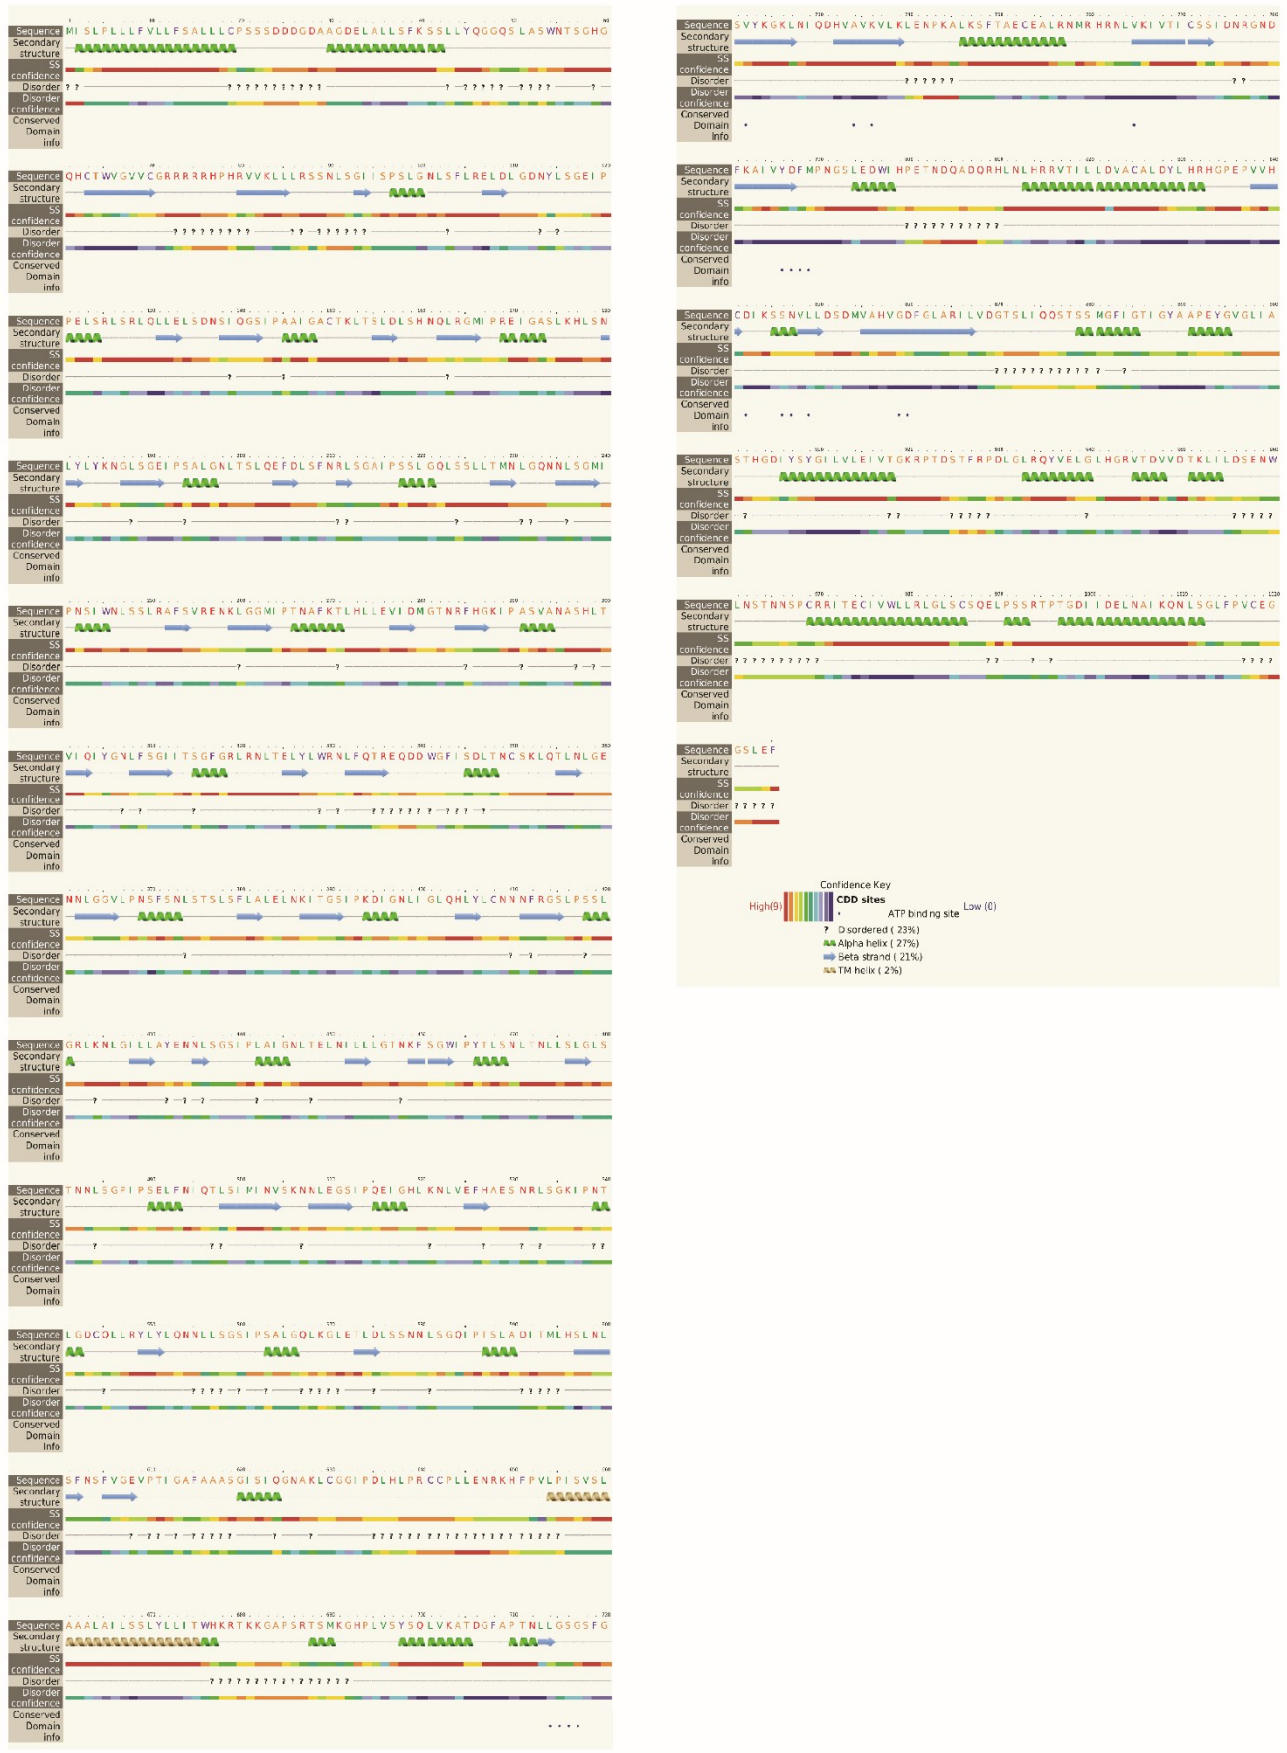

Fig. S2 Secondary structure of Xa21 protein predicted by PSIPRED

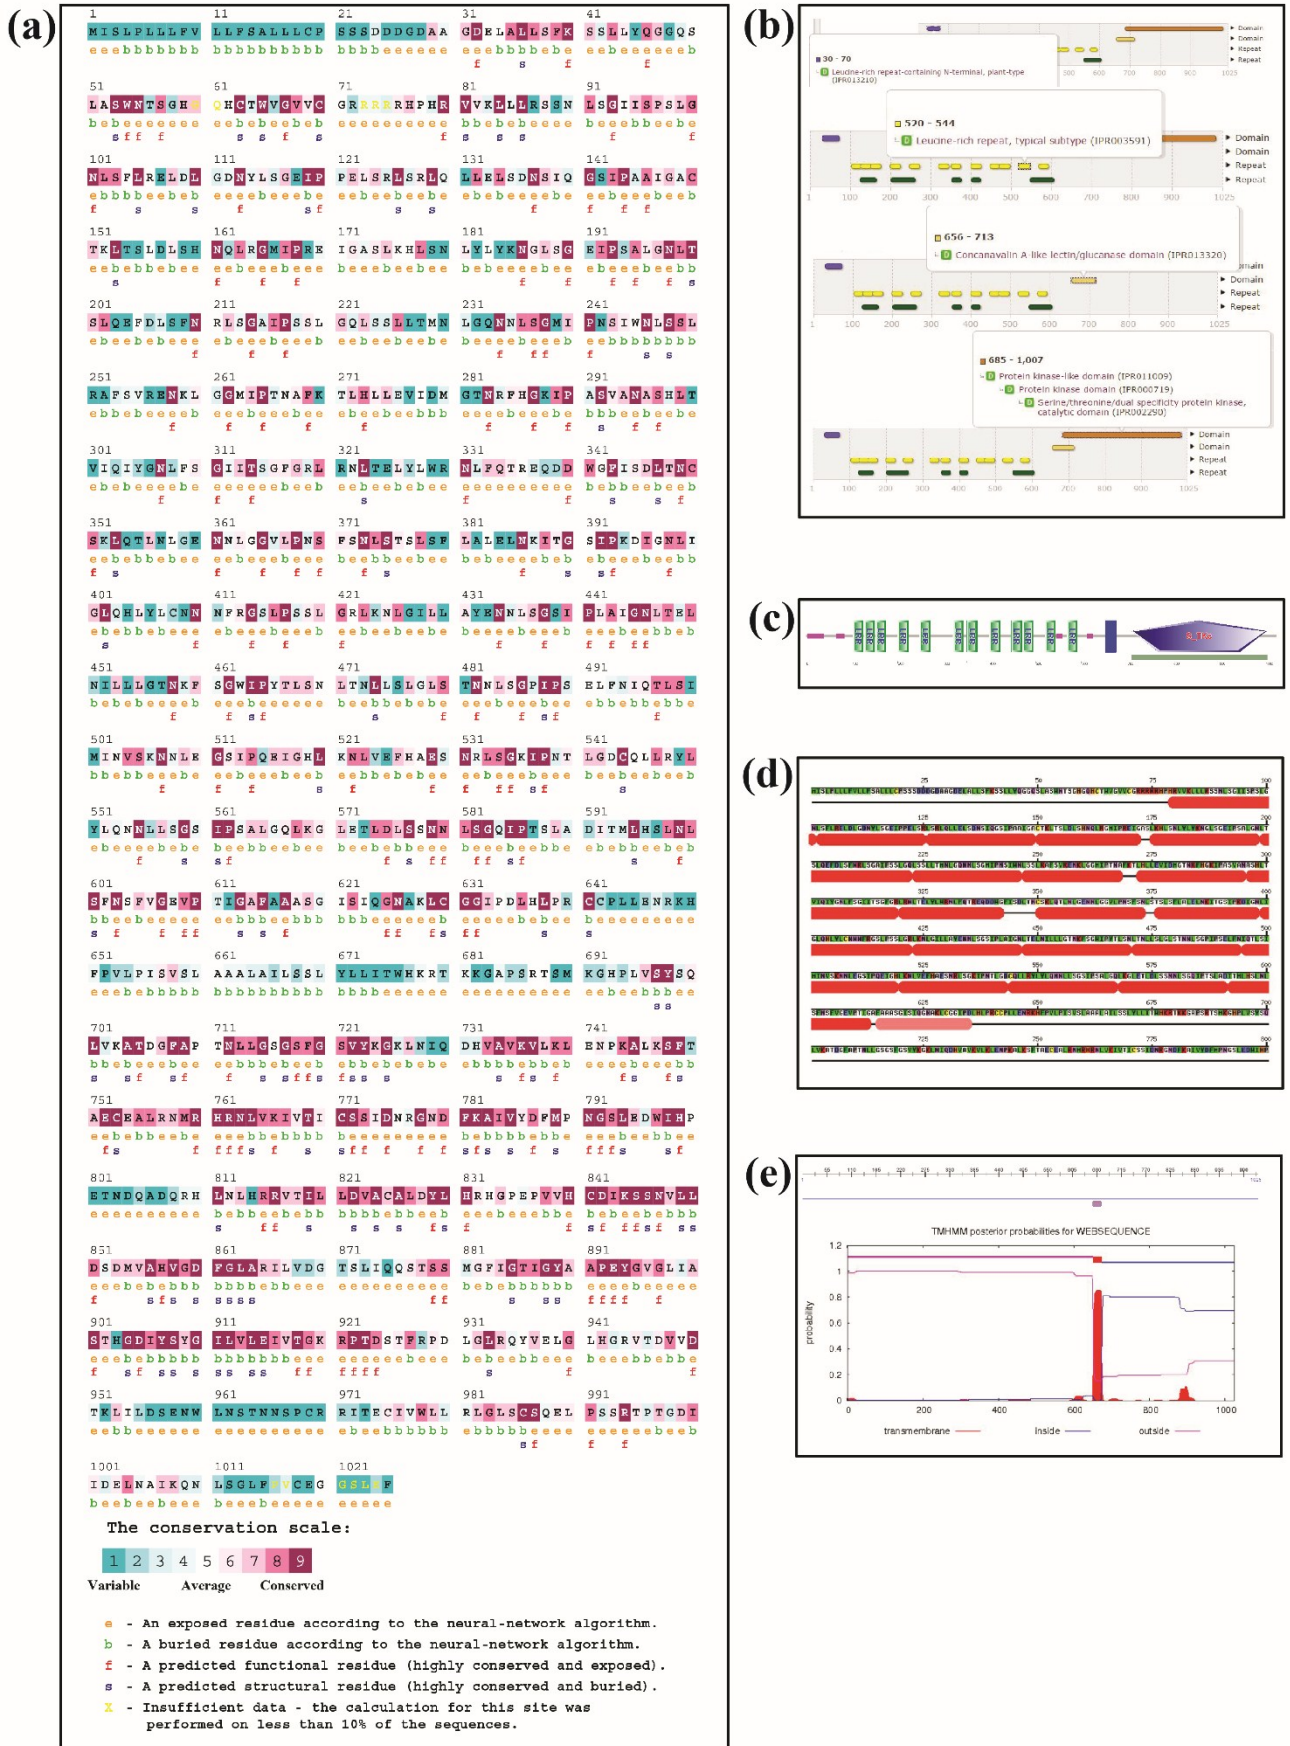

**Fig. S3** (a) Conserved region prediction of Xa21 by the ConSurf tool. (b) Domain boundary prediction of Xa21 using InterPro. (c) Domain boundary prediction of Xa21 by the SMART tool. (d) Repeated Xa21 LRR region prediction by the HHrepID tool. (e) Transmembrane region prediction of Xa21 protein by the TMHMM tool.

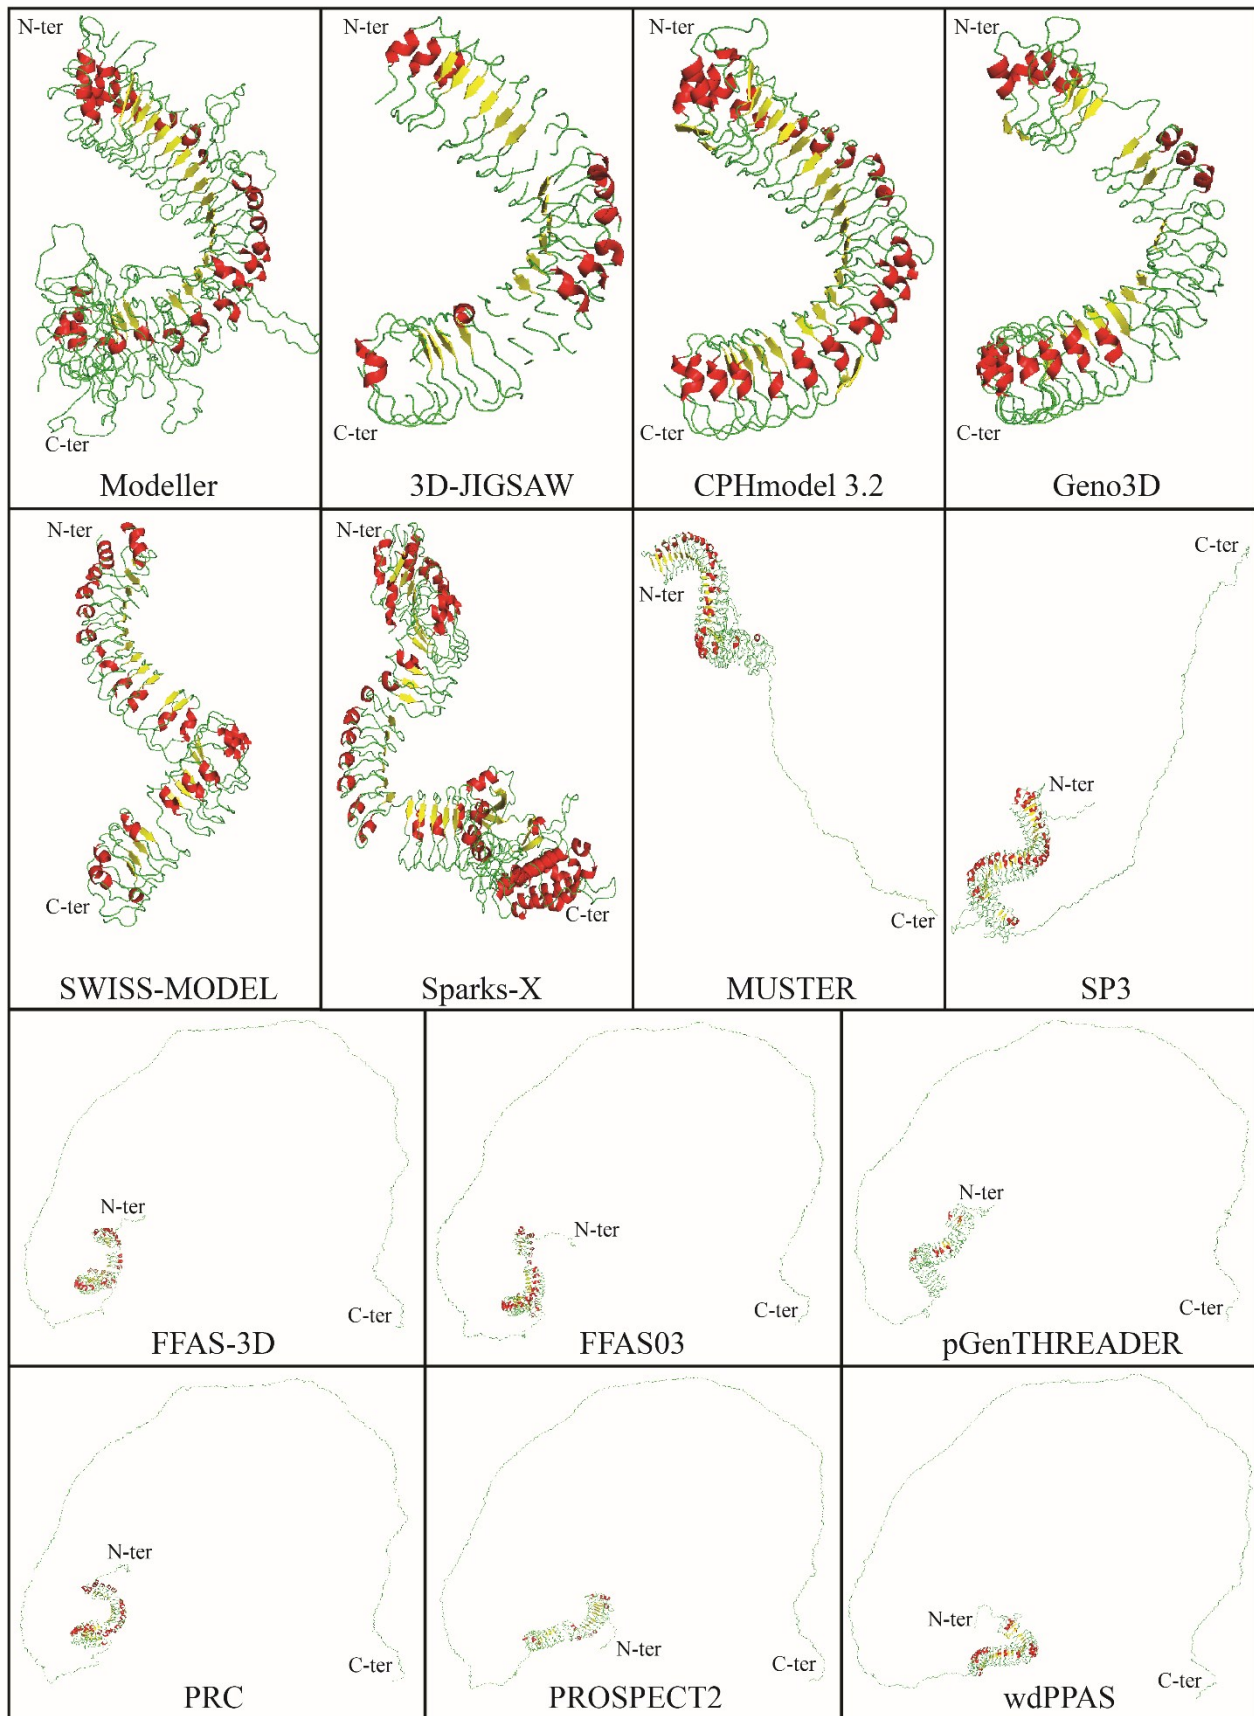

**Fig. S4** Cartoon representations of the Xa21 proteins modeled using single template modeling approaches. Red colored regions indicate alpha helices, yellow colored regions indicate beta sheets and green colored regions indicate coiled regions.

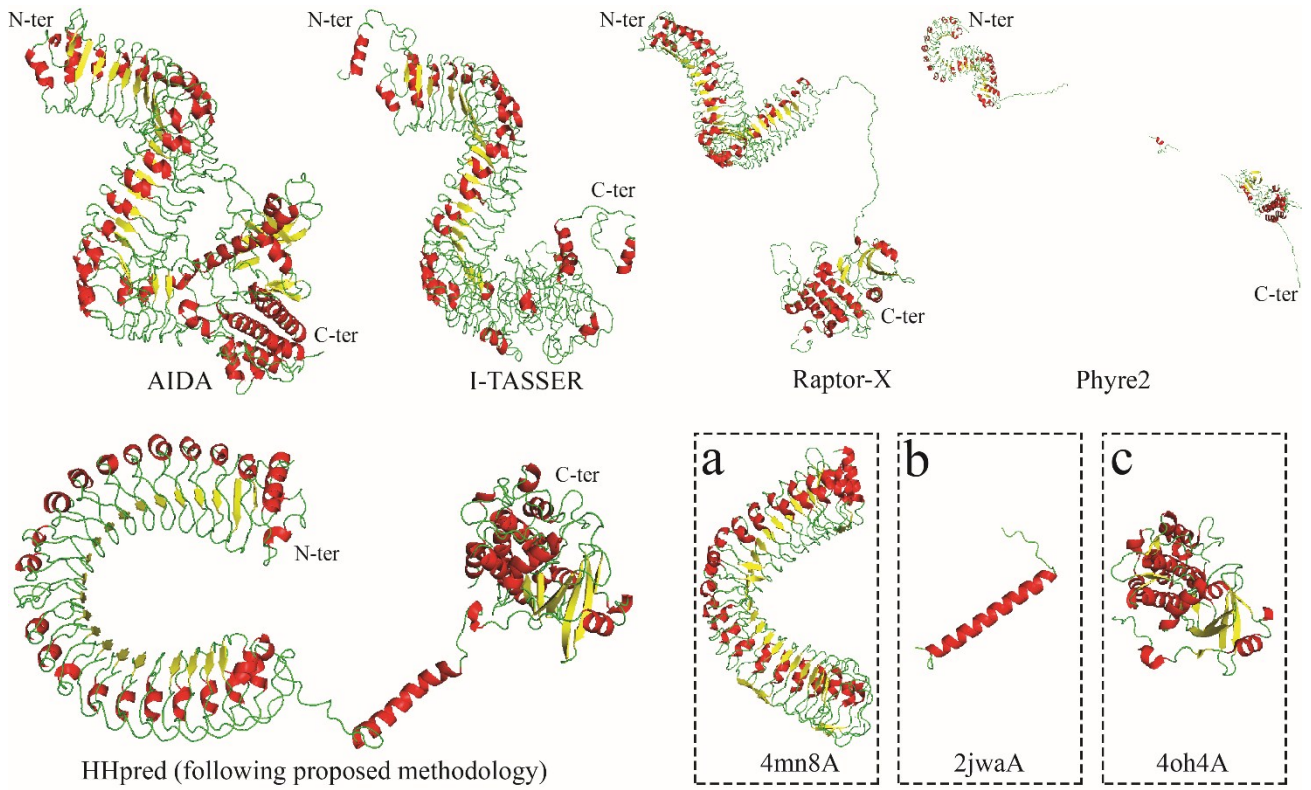

**Fig. S5.** Cartoon representations of the Xa21 protein modeled using multiple template modeling approaches. The boxed proteins are 3D structures of the best template from the PDB - (a) LRR domain, (b) TM domain, (c) Kinase domain, of Xa21. Red colored regions indicate alpha helices, yellow colored regions indicate beta sheets and green colored regions indicate coil regions.

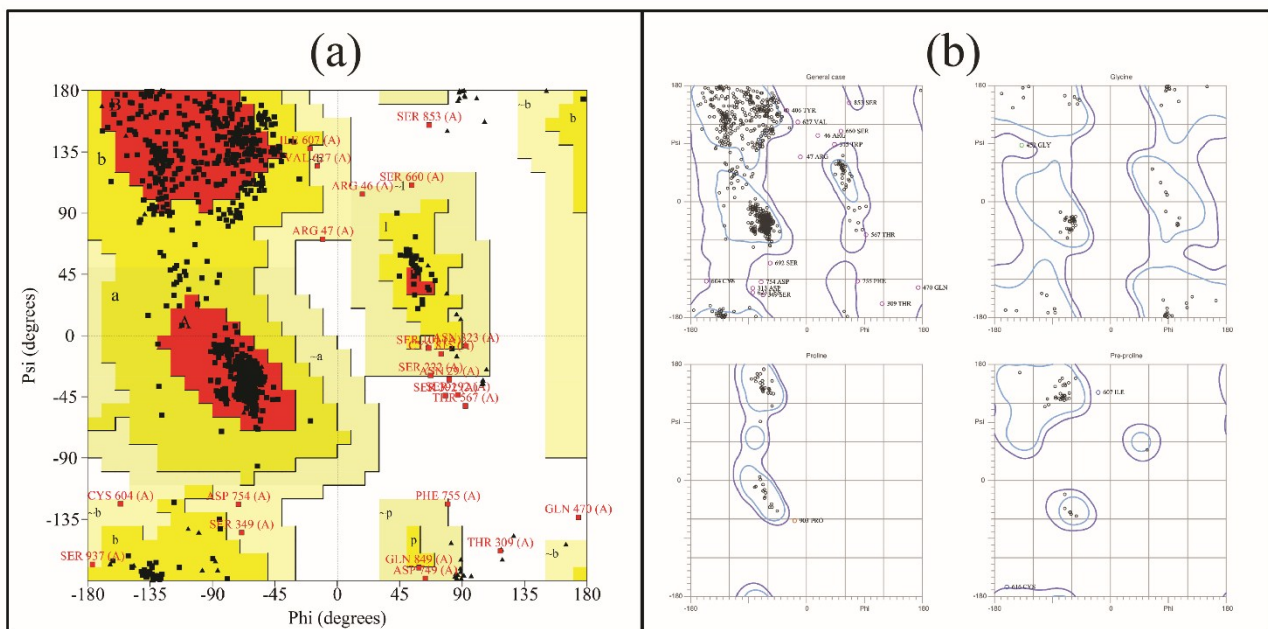

**Fig. S6.** Ramachandran plot summary for Xa21 protein modeled by the HHpred server is on the right-hand side and the left-hand side figure indicates the MolProbity for the Ramachandran plot.

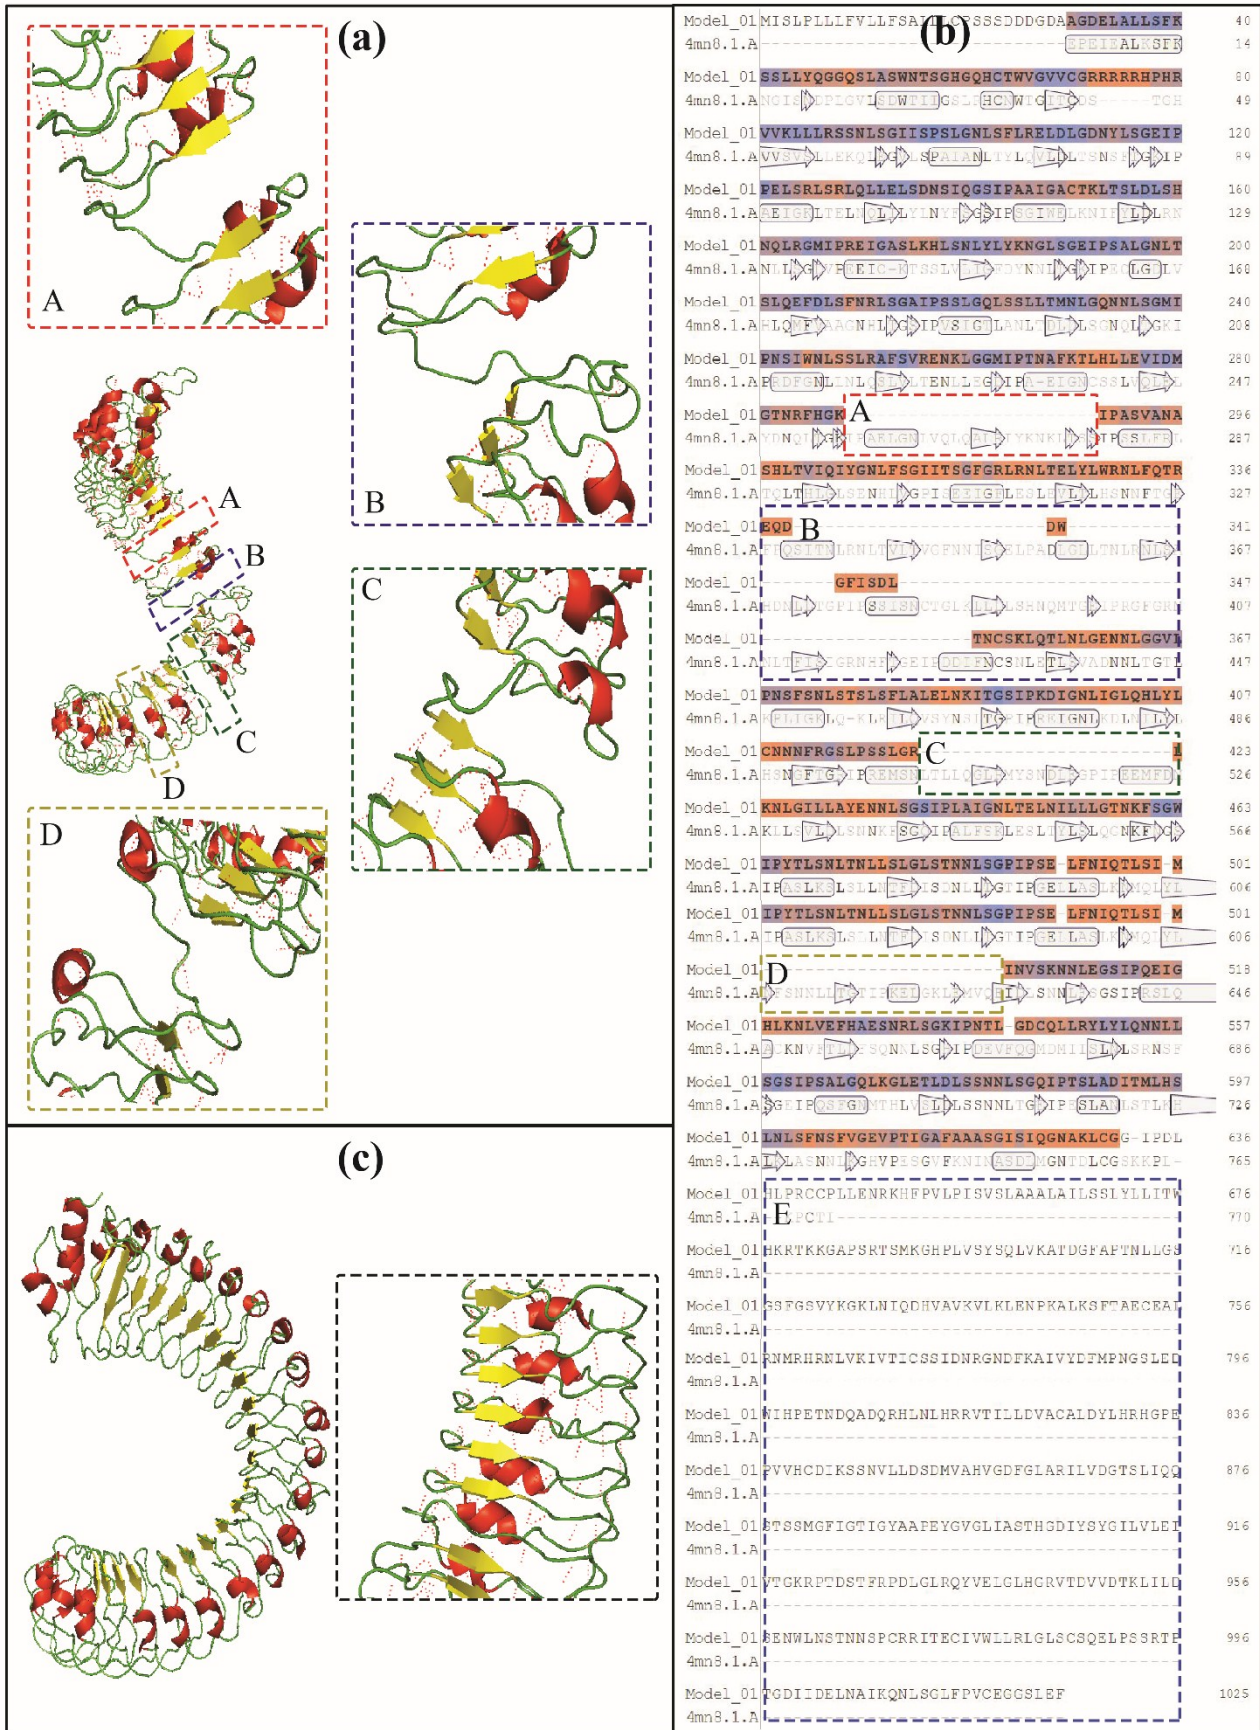

**Fig. S7.** (a) Cartoon representation of the Xa21 protein modeled by the Swiss-model tool showing the different gaps in the structure. (b) Alignment of the modeled protein sequence and the template sequence by Swiss-model. (c) Cartoon representation of LRR domain modeled by the HHpred server. Red colored regions indicate alpha helix, yellow colored regions indicate beta sheet and green colored regions indicate coil region.

**Table S1A.** Modeling methodology of the Xa21 Protein using Single Template Modeling approach

| <b>Tool</b>   | <b>Modeling Method</b> | <b>Template</b> |
|---------------|------------------------|-----------------|
| Modeller 9.15 | Homology               | 4mn8A           |
| 3D-JIGSAW     | Homology               | 4mn8A           |
| CPHmodel 3.2  | Homology               | 4mn8A           |
| Geno3D        | Homology               | 4mn8A           |
| Swissmodel    | Homology               | 4mn8A           |
| PRC           | Threading              | 4mn8A           |
| pGenTHREADER  | Threading              | 4mn8A           |
| Prospect2     | Threading              | 4mn8A           |
| FFAS-3D       | Threading              | 4mn8A           |
| FFAS03        | Threading              | 4mn8A           |
| SP3           | Threading              | 4mn8A           |
| Sparks-X      | Threading              | 4mn8A           |
| Musterm       | Threading              | 4mn8A           |
| WdPPAS        | Threading              | 4j0mA           |

**Table S1B.** Modeling methodology of the Xa21 Protein using Multiple Template Modeling Approach

| <b>R/P ID</b> | <b>R/P Name</b> | <b>AA boundary</b> | <b>Tool</b> | <b>Modeling Method</b> | <b>Template(s)</b>            |
|---------------|-----------------|--------------------|-------------|------------------------|-------------------------------|
| Xa21lrr_1     | N-term+LRR      | 27-634             | HHpred      | Homology               | 4mn8A                         |
| Xa21lrr_2     | N-term+LRR      | 27-634             | HHpred      | Homology               | 4mn8A+4j0mA                   |
| Xa21lrr_3     | N-term+LRR      | 27-634             | HHpred      | Homology               | 4mn8A+3rgzA                   |
| Xa21lrr_4     | N-term+LRR      | 27-634             | HHpred      | Homology               | 4mn8A+1ogqA                   |
| Xa21lrr_5     | N-term+LRR      | 27-634             | HHpred      | Homology               | 4mn8A+4j0mA+1ogqA             |
| Xa21lrr_6     | N-term+LRR      | 27-634             | HHpred      | Homology               | 4mn8A+1ogqA+3rgzA             |
| Xa21lrr_7     | N-term+LRR      | 27-634             | HHpred      | Homology               | 4mn8A+3rgzA+4j0mA             |
| Xa21lrr_8     | N-term+LRR      | 27-634             | HHpred      | Homology               | 4mn8A+1ogqA+4j0mA+3rgzA       |
| Xa21lrr_9     | N-term+LRR      | 27-634             | HHpred      | Homology               | 4mn8A+4u08A                   |
| Xa21lrr_10    | N-term+LRR      | 27-634             | HHpred      | Homology               | 4mn8A+4u08A+3rgzA             |
| Xa21lrr_11    | N-term+LRR      | 27-634             | HHpred      | Homology               | 4mn8A+4u08A+4j0mA             |
| Xa21lrr_12    | N-term+LRR      | 27-634             | HHpred      | Homology               | 4mn8A+4u08A+1ogqA             |
| Xa21lrr_13    | N-term+LRR      | 27-634             | HHpred      | Homology               | 4mn8A+4u08A+3rgzA+4j0mA       |
| Xa21lrr_14    | N-term+LRR      | 27-634             | HHpred      | Homology               | 4mn8A+4u08A+4j0mA+1ogqA       |
| Xa21lrr_15    | N-term+LRR      | 27-634             | HHpred      | Homology               | 4mn8A+4u08A+4j0mA+3rgzA+1ogqA |
| Xa21lrr_16    | N-term+LRR      | 27-634             | HHpred      | Homology               | 4u08A+3rgzA                   |
| Xa21lrr_17    | N-term+LRR      | 27-634             | HHpred      | Homology               | 4u08A+4j0mA                   |
| Xa21lrr_18    | N-term+LRR      | 27-634             | HHpred      | Homology               | 4u08A+1ogqA                   |
| Xa21lrr_19    | N-term+LRR      | 27-634             | HHpred      | Homology               | 3rgzA+4j0mA                   |
| Xa21lrr_20    | N-term+LRR      | 27-634             | HHpred      | Homology               | 3rgzA+1ogqA                   |
| Xa21lrr_21    | N-term+LRR      | 27-634             | HHpred      | Homology               | 4j0mA+1ogqA                   |
| Xa21lrr_22    | N-term+LRR      | 27-634             | HHpred      | Homology               | 4u08A+3rgzA+4j0mA             |
| Xa21lrr_23    | N-term+LRR      | 27-634             | HHpred      | Homology               | 4u08A+3rgzA+1ogqA             |
| Xa21lrr_24    | N-term+LRR      | 27-634             | HHpred      | Homology               | 4u08A+4j0mA+1ogqA             |
| Xa21lrr_25    | N-term+LRR      | 27-634             | HHpred      | Homology               | 3rgzA+4j0mA+1ogqA             |

|             |             |          |        |          |                         |
|-------------|-------------|----------|--------|----------|-------------------------|
| Xa21lrr_26  | N-term+LRR  | 27-634   | HHpred | Homology | 4u08A+3rgzA+4j0mA+1ogqA |
| Xa21lrr_27  | N-term+LRR  | 27-634   | HHpred | Homology | 3rgzA                   |
| Xa21lrr_28  | N-term+LRR  | 27-634   | HHpred | Homology | 4j0mA                   |
| Xa21lrr_29  | N-term+LRR  | 27-634   | HHpred | Homology | 1ogqA                   |
| Xa21lrr_30  | N-term+LRR  | 27-634   | HHpred | Homology | 4u08A                   |
| Xa21lrr_31  | N-term+LRR  | 27-634   | HHpred | Homology | 4mn8A+4u08A+3rgzA+1ogqA |
| Xa21c12tm_1 | TM+c1+c2    | 651-707  | HHpred | Homology | 2jwaA                   |
| Xa21c12tm_2 | TM+c1+c2    | 651-707  | HHpred | Homology | 2ks1B                   |
| Xa21c12tm_3 | TM+c1+c2    | 651-707  | HHpred | Homology | 2jwaA+2ks1B             |
| Xa21k_1     | JM+K+C-term | 708-1004 | HHpred | Homology | 4oh4A                   |
| Xa21k_2     | JM+K+C-term | 708-1004 | HHpred | Homology | 3uimA                   |
| Xa21k_3     | JM+K+C-term | 708-1004 | HHpred | Homology | 4l68A                   |
| Xa21k_4     | JM+K+C-term | 708-1004 | HHpred | Homology | 2nruA                   |
| Xa21k_5     | JM+K+C-term | 708-1004 | HHpred | Homology | 2qkwB                   |
| Xa21k_6     | JM+K+C-term | 708-1004 | HHpred | Homology | 4oh4A+3uimA             |
| Xa21k_7     | JM+K+C-term | 708-1004 | HHpred | Homology | 4oh4A+4l68A             |
| Xa21k_8     | JM+K+C-term | 708-1004 | HHpred | Homology | 4oh4A+2nruA             |
| Xa21k_9     | JM+K+C-term | 708-1004 | HHpred | Homology | 4oh4A+2qkwB             |
| Xa21k_10    | JM+K+C-term | 708-1004 | HHpred | Homology | 3uimA+4l68A             |
| Xa21k_11    | JM+K+C-term | 708-1004 | HHpred | Homology | 3uimA+2nruA             |
| Xa21k_12    | JM+K+C-term | 708-1004 | HHpred | Homology | 3uimA+2qkwB             |
| Xa21k_13    | JM+K+C-term | 708-1004 | HHpred | Homology | 4l68A+2nruA             |
| Xa21k_14    | JM+K+C-term | 708-1004 | HHpred | Homology | 4l68A+2qkwB             |
| Xa21k_15    | JM+K+C-term | 708-1004 | HHpred | Homology | 2nruA+2qkwB             |
| Xa21k_16    | JM+K+C-term | 708-1004 | HHpred | Homology | 4oh4A+3uimA+4l68A       |
| Xa21k_17    | JM+K+C-term | 708-1004 | HHpred | Homology | 4oh4A+3uimA+2nruA       |
| Xa21k_18    | JM+K+C-term | 708-1004 | HHpred | Homology | 4oh4A+3uimA+2qkwB       |
| Xa21k_19    | JM+K+C-term | 708-1004 | HHpred | Homology | 3uimA+4l68A+2nruA       |



|            |             |          |                     |                                 |                                              |
|------------|-------------|----------|---------------------|---------------------------------|----------------------------------------------|
|            | term        |          |                     |                                 |                                              |
| Xa21k_20   | JM+K+C-term | 708-1004 | HHpred              | Homology                        | 3uimA+4l68A+2qkwB                            |
| Xa21k_21   | JM+K+C-term | 708-1004 | HHpred              | Homology                        | 4l68A+2nruA+2qkwB                            |
| Xa21k_22   | JM+K+C-term | 708-1004 | HHpred              | Homology                        | 40h4A+2nruA+2qkwB                            |
| Xa21k_23   | JM+K+C-term | 708-1004 | HHpred              | Homology                        | 3uimA+4l68A+2qkwB                            |
| Xa21k_24   | JM+K+C-term | 708-1004 | HHpred              | Homology                        | 3uimA+2nruA+2qkwB                            |
| Xa21k_25   | JM+K+C-term | 708-1004 | HHpred              | Homology                        | 4oh4A+4l68A+2qkwB                            |
| Xa21k_26   | JM+K+C-term | 708-1004 | HHpred              | Homology                        | 4oh4A+4l68A+2nruA+2qkwB                      |
| Xa21k_27   | JM+K+C-term | 708-1004 | HHpred              | Homology                        | 4oh4A+3uimA+4l68A+2nruA                      |
| Xa21k_28   | JM+K+C-term | 708-1004 | HHpred              | Homology                        | 3uimA+4l68A+2nruA+2qkwB                      |
| Xa21k_29   | JM+K+C-term | 708-1004 | HHpred              | Homology                        | 4oh4A+4l68A+2nruA+2qkwB                      |
| Xa21k_30   | JM+K+C-term | 708-1004 | HHpred              | Homology                        | 4oh4A+3uimA+4l68A+2nruA+2qkwB                |
| Xa21k_31   | JM+K+C-term | 708-1004 | HHpred              | Homology                        | 4oh4A+3uimA+2nruA+2qkwB                      |
| Xa21_Final | Xa21        | 27-1009  | HHpred              | Homology                        | Xa21lrr_15+Xa21c12tm_3+Xa21k_1               |
| Xa21_AIDA  | Xa21        | 27-1009  | AIDA                | Homology                        | 4mnA+2jwA+4l68A                              |
| Xa21_I-Tas | Xa21        | 1-1025   | I-Tasser            | <i>Ab initio</i> &<br>Threading | 4mn8A(7)+4oa2A+4j0mA                         |
| Xa21_Phyl  | Xa21        | 1-1025   | Phyre2<br>Intensive | Homology& <i>Ab initio</i>      | 4mn8A(2)+4y93A+2j0kB+1op1A+4xi2A+1y57A+2fo0A |
| Xa21_RapX  | Xa21        | 1-1025   | Raptor-X            | Threading                       | 4mn8A+3tl8A+4oa2A+4oa6A                      |

R/P ID, Region or Protein ID; R/P Name, Region or protein Name; AA, Amino Acid; LRR, Leucine rich repeat; TM+C1+C2, Transmembrane and Charged 1 and Charged 2 region; JM+K+C-term, Juxtamembrane and Kinase and C terminal region.

**Table S2A.** NCBI BLASP analysis of different domain regions of Xa21

| Region            | AA Boundary    | PDB ID | Max. Score | E-value  | Q C (%) | Idn. (%) | Template Short Identity                                                                                                |
|-------------------|----------------|--------|------------|----------|---------|----------|------------------------------------------------------------------------------------------------------------------------|
| <b>Xa21 full</b>  | <b>1-1025</b>  | 4mn8_A | 311        | 4.00E-91 | 58      | 33       | Chain A, Crystal Structure Of Flg22 In Complex With The Fls2 And Bak1 Ectodomains                                      |
|                   |                | 4j0m_A | 206        | 3.00E-55 | 54      | 33       | Chain A, Crystal Structure Of Brl1 (Irr) In Complex With Brassinolide                                                  |
|                   |                | 3riz_A | 201        | 2.00E-53 | 54      | 33       | Chain A, Crystal Structure Of The Plant Steroid Receptor Bri1 Ectodomain                                               |
|                   |                | 4oa9_A | 169        | 1.00E-45 | 25      | 38       | Chain A, Crystal Structure Of The Bri1 Kinase Domain (865-1160) In Complex With Ampnp And Mn From Arabidopsis Thaliana |
|                   |                | 3uim_A | 129        | 8.00E-32 | 22      | 36       | Chain A, Structural Basis For The Impact Of Phosphorylation On Plant Receptor- Like Kinase Bak1 Activation             |
| <b>Xa21</b>       | <b>27-1009</b> | 4mn8_A | 312        | 1.00E-91 | 61      | 33       | Chain A, Crystal Structure Of Flg22 In Complex With The Fls2 And Bak1 Ectodomains                                      |
|                   |                | 4j0m_A | 206        | 1.00E-55 | 57      | 33       | Chain A, Crystal Structure Of Brl1 (Irr) In Complex With Brassinolide                                                  |
|                   |                | 3riz_A | 201        | 9.00E-54 | 57      | 33       | Chain A, Crystal Structure Of The Plant Steroid Receptor Bri1 Ectodomain                                               |
|                   |                | 4oa9_A | 169        | 8.00E-46 | 26      | 38       | Chain A, Crystal Structure Of The Bri1 Kinase Domain (865-1160) In Complex With Ampnp And Mn From Arabidopsis Thaliana |
|                   |                | 3uim_A | 129        | 7.00E-32 | 23      | 36       | Chain A, Structural Basis For The Impact Of Phosphorylation On Plant Receptor- Like Kinase Bak1 Activation             |
| <b>N-term+LRR</b> | <b>27-634</b>  | 4mn8_A | 312        | 4.00E-95 | 98      | 33       | Chain A, Crystal Structure Of Flg22 In Complex With The Fls2 And Bak1 Ectodomains                                      |
|                   |                | 3riz_A | 212        | 7.00E-59 | 91      | 32       | Chain A, Crystal Structure Of The                                                                                      |

|                      |                 |        |      |          |    |    |                                                                                                                                        |
|----------------------|-----------------|--------|------|----------|----|----|----------------------------------------------------------------------------------------------------------------------------------------|
|                      |                 |        |      |          |    |    | Plant Steroid Receptor Bri1 Ectodomain                                                                                                 |
|                      |                 | 4j0m_A | 207  | 3.00E-57 | 92 | 33 | Chain A, Crystal Structure Of Br11 (Irr) In Complex With Brassinolide                                                                  |
|                      |                 | 1ogq_A | 105  | 2.00E-24 | 98 | 32 | Chain A, The Crystal Structure Of Pqip (Polygalacturonase Inhibiting Protein), A Leucine Rich Repeat Protein Involved In Plant Defense |
|                      |                 | 4u08_A | 103  | 2.00E-23 | 67 | 29 | Chain A, Structure Of LeptospiraInterrogansLrr Protein Lic11098                                                                        |
| <b>C1+TM+C2+JM+K</b> | <b>635-1009</b> | 4oh4_A | 166  | 7.00E-47 | 69 | 38 | Chain A, Crystal Structure Of Bri1 In Complex With Bki1                                                                                |
|                      |                 | 3uim_A | 130  | 7.00E-34 | 60 | 36 | Chain A, Structural Basis For The Impact Of Phosphorylation On Plant Receptor- Like Kinase Bak1 Activation                             |
|                      |                 | 4l68_A | 108  | 2.00E-26 | 88 | 28 | Chain A, Structure Of The Pseudokinase Domain Of Bir2, An Immune Regulator Of The Rlk/pelle Family                                     |
|                      |                 | 2nru_A | 107  | 5.00E-26 | 63 | 34 | Chain A, Crystal Structure Of Irak-4                                                                                                   |
|                      |                 | 2qkw_B | 99.4 | 3.00E-23 | 69 | 31 | Chain B, Structural Basis For Activation Of Plant Immunity By Bacterial Effector Protein Avrpto                                        |
| <b>JM+K+C-term</b>   | <b>683-1009</b> | 4oh4_A | 166  | 2.00E-47 | 79 | 38 | Chain A, Crystal Structure Of Bri1 In Complex With Bki1                                                                                |
|                      |                 | 3uim_A | 130  | 3.00E-34 | 69 | 35 | Chain A, Structural Basis For The Impact Of Phosphorylation On Plant Receptor- Like Kinase Bak1 Activation                             |
|                      |                 | 4l68_A | 108  | 2.00E-26 | 99 | 28 | Chain A, Structure Of The Pseudokinase Domain Of Bir2, An Immune Regulator Of The Rlk/pelle Family                                     |
|                      |                 | 2nru_A | 107  | 2.00E-26 | 72 | 34 | Chain A, Crystal Structure Of Irak-4                                                                                                   |
|                      |                 | 2qkw_B | 99.4 | 1.00E-23 | 79 | 31 | Chain B, Structural Basis For                                                                                                          |

|  |  |  |  |  |  |  |                                                                      |
|--|--|--|--|--|--|--|----------------------------------------------------------------------|
|  |  |  |  |  |  |  | Activation Of Plant Immunity By<br>Bacterial Effector Protein Avrpto |
|--|--|--|--|--|--|--|----------------------------------------------------------------------|

AA, Amino Acid; Max. Score, Maximum Score; Q C, Query Coverage; Idn., Identity; N-term, N terminal region; LRR, Leucine Rich Repeat; C1, Charged1; TM, Transmembrane; C2, Charged2; JM, Juxtamembrane; K, Kinase; C-term, C terminal.

**Table S2B.** HHpred analysis of Charged1, Transmembrane and Charged2 regions of the Xa21 protein

| Region          | AA Boundary    | PDB ID | Score | E-value | P-value  | Probability (%) | Template Short Identity                        |
|-----------------|----------------|--------|-------|---------|----------|-----------------|------------------------------------------------|
| <b>C1+TM+C2</b> | <b>635-682</b> | 2jwa_A | 30.7  | 0.0024  | 6.70E-08 | 96.1            | Receptor tyrosine-<br>protein kinase<br>ERBB-2 |
|                 |                | 2ks1_B | 27.8  | 0.016   | 4.30E-07 | 95.1            | Epidermal growth<br>factor receptor            |

AA, Amino Acid; C1, Charged1 region; TM, Transmembrane region; C2, Charged 2 region.

**Table S3.** Predictions of the Leucine rich repeat (LRR) domain and domain boundary using different tools

| Domain Name | Song <i>et al</i> 1996 |        | HHrepID  |        | Irrfinder.com |        | SMART    |        |
|-------------|------------------------|--------|----------|--------|---------------|--------|----------|--------|
|             | Start AA               | End AA | Start AA | End AA | Start AA      | End AA | Start AA | End AA |
| LRR1        | 81                     | 98     | 79       | 101    | 104           | 127    | 102      | 125    |
| LRR2        | 99                     | 122    | 102      | 125    | 128           | 151    | 126      | 150    |
| LRR3        | 123                    | 146    | 126      | 149    | 152           | 176    | 151      | 174    |
| LRR4        | 147                    | 170    | 150      | 172    | 177           | 200    | 199      | 223    |
| LRR5        | 172                    | 195    | 175      | 198    | 201           | 224    | 247      | 271    |
| LRR6        | 196                    | 219    | 199      | 222    | 225           | 248    | 320      | 343    |
| LRR7        | 220                    | 243    | 223      | 246    | 249*          | 273*   | 350      | 373    |
| LRR8        | 244                    | 267    | 247      | 268    | 274           | 321    | 399      | 423    |
| LRR9        | 269                    | 292    | 272      | 295    | 322           | 351    | 447      | 470    |
| LRR10       | 293                    | 316    | 296      | 319    | 352           | 376    | 471      | 495    |
| LRR11       | 317                    | 340    | 320      | 342    | 377           | 400    | 520      | 544    |
| LRR12       | 347                    | 370    | 350      | 373    | 401           | 448    | 568      | 591    |
| LRR13       | 372                    | 395    | 376      | 398    | 449*          | 472*   |          |        |
| LRR14       | 396                    | 419    | 399      | 422    | 473*          | 545*   |          |        |
| LRR15       | 420                    | 443    | 423      | 446    | 546           | 569    |          |        |
| LRR16       | 444                    | 467    | 447      | 470    | 570           | 593    |          |        |
| LRR17       | 468                    | 491    | 471      | 494    | 594**         | 1025** |          |        |
| LRR18       | 492                    | 516    | 495      | 519    |               |        |          |        |
| LRR19       | 517                    | 540    | 520      | 543    |               |        |          |        |
| LRR20       | 541                    | 564    | 544      | 567    |               |        |          |        |
| LRR21       | 565                    | 588    | 568      | 591    |               |        |          |        |
| LRR22       | 589                    | 611    | 592      | 613    |               |        |          |        |
| LRR23       | 612                    | 634    | 615      | 635    |               |        |          |        |

AA, Amino Acid.

\*Insignificant hit.

\*\* Potential Leucine Rich Repeat at C terminal.

**Table S4.** Model validation of different regions of the Xa21 Protein Modeled using the HHpred toolkit

| R/P ID     | Errat  | Verify 3D (%) | Ramachandran Plot Summary from Procheck (%) |      |     |     |
|------------|--------|---------------|---------------------------------------------|------|-----|-----|
|            |        |               | MFR                                         | AAR  | GAR | DR  |
| Xa21lrr_1  | 67.5   | 93.91         | 77.6                                        | 19.9 | 1.3 | 1.1 |
| Xa21lrr_2  | 61.333 | 97.7          | 72.5                                        | 25.2 | 1.7 | 0.6 |
| Xa21lrr_3  | 55     | 93.59         | 72.1                                        | 24.9 | 1.1 | 1.9 |
| Xa21lrr_4  | 74.167 | 96.71         | 76.5                                        | 21.8 | 1.3 | 0.4 |
| Xa21lrr_5  | 64.167 | 96.71         | 74.6                                        | 23.1 | 1.5 | 0.8 |
| Xa21lrr_6  | 61     | 93.03         | 71.3                                        | 25.8 | 0.8 | 2.1 |
| Xa21lrr_7  | 58.794 | 96.71         | 70.6                                        | 27.2 | 1.3 | 1   |
| Xa21lrr_8  | 58.667 | 99.84         | 71.9                                        | 26.4 | 1   | 0.8 |
| Xa21lrr_9  | 71     | 93.91         | 75.7                                        | 21.2 | 1.7 | 1.3 |
| Xa21lrr_10 | 51.5   | 95.07         | 70.7                                        | 25.8 | 1.7 | 1.7 |
| Xa21lrr_11 | 61.833 | 99.67         | 72.5                                        | 1.1  | 1.1 |     |
| Xa21lrr_12 | 67.667 | 91.94         | 75                                          | 22.8 | 1.3 | 1   |
| Xa21lrr_13 | 65.5   | 96.05         | 71.3                                        | 27   | 0.6 | 1.1 |
| Xa21lrr_14 | 59.167 | 94.9          | 73.6                                        | 24.1 | 1   | 1.3 |
| Xa21lrr_15 | 63.167 | 100           | 70.6                                        | 26.8 | 1   | 1.7 |
| Xa21lrr_16 | 46.667 | 91.61         | 71.5                                        | 26.8 | 1.5 | 0.2 |
| Xa21lrr_17 | 61.333 | 91.78         | 72.8                                        | 25.4 | 0.8 | 1   |
| Xa21lrr_18 | 43.937 | 84.7          | 74.8                                        | 22.4 | 2.5 | 0.4 |
| Xa21lrr_19 | 59.365 | 92.93         | 70.9                                        | 27.3 | 0.8 | 1   |
| Xa21lrr_20 | 56.167 | 95.07         | 73.6                                        | 25.8 | 1.1 | 0   |
| Xa21lrr_21 | 66     | 96.88         | 70.7                                        | 28.3 | 0.4 | 0.6 |
| Xa21lrr_22 | 61     | 92.27         | 71.5                                        | 26.8 | 1   | 0.8 |
| Xa21lrr_23 | 58.167 | 94.41         | 72.1                                        | 26.2 | 1.5 | 0.2 |
| Xa21lrr_24 | 69.5   | 97.2          | 75                                          | 24.1 | 0.8 | 0.2 |
| Xa21lrr_25 | 60.667 | 97.86         | 70.2                                        | 27.9 | 1   | 1   |
| Xa21lrr_26 | 62.167 | 99.34         | 72.5                                        | 26.6 | 0.8 | 0.2 |
| Xa21lrr_27 | 45.74  | 90.46         | 69.2                                        | 28.3 | 1.7 | 0.8 |
| Xa21lrr_28 | 51.33  | 93.75         | 70                                          | 27.5 | 1.5 | 1   |

|             |        |       |      |      |     |     |
|-------------|--------|-------|------|------|-----|-----|
| Xa21lrr_29  | E      | 46.05 | 87   | 12   | 0.4 | 0.6 |
| Xa21lrr_30  | 56.494 | 62.17 | 80.1 | 17   | 1.9 | 1   |
| Xa21lrr_31  | 72.194 | 90.95 | 81.8 | 16.6 | 0.6 | 1   |
| Xa21c12tm_1 | 67.5   | 0     | 95.2 | 4.8  | 0   | 0   |
| Xa21c12tm_2 | 60.526 | 0     | 88.1 | 11.9 | 0   | 0   |
| Xa21c12tm_3 | 81.579 | 0     | 92.9 | 7.1  | 0   | 0   |
| Xa21k_1     | 80.189 | 84.71 | 90.6 | 7.7  | 1.4 | 0.3 |
| Xa21k_2     | 67.192 | 74.92 | 89.2 | 8    | 1.7 | 1   |
| Xa21k_3     | 50.159 | 76.45 | 85   | 12.9 | 0.3 | 1.7 |
| Xa21k_4     | 64.353 | 67.89 | 86   | 9.4  | 2.8 | 1.7 |
| Xa21k_5     | 67.192 | 70.03 | 81.8 | 15   | 2.8 | 0.3 |
| Xa21k_6     | 70.219 | 90.52 | 88.8 | 7.3  | 1.4 | 2.4 |
| Xa21k_7     | 69.231 | 82.26 | 88.8 | 9.1  | 1.4 | 0.7 |
| Xa21k_8     | 65.696 | 88.38 | 87.1 | 10.5 | 2.1 | 0.3 |
| Xa21k_9     | 69.206 | 85.93 | 85.7 | 10.5 | 2.1 | 1.7 |
| Xa21k_10    | 76.025 | 80.43 | 87.8 | 9.4  | 2.1 | 0.7 |
| Xa21k_11    | 59.873 | 81.65 | 88.1 | 8.7  | 2.4 | 0.7 |
| Xa21k_12    | 59.973 | 76.15 | 85   | 11.9 | 2.8 | 0.3 |
| Xa21k_13    | 73.27  | 63.91 | 85.3 | 12.2 | 2.1 | 0.3 |
| Xa21k_14    | 75.159 | 82.87 | 82.5 | 15   | 1.7 | 0.7 |
| Xa21k_15    | 53.312 | 66.97 | 86.4 | 9.4  | 2.8 | 1.4 |
| Xa21k_16    | 78.797 | 78.9  | 87.8 | 10.8 | 0.7 | 0.7 |
| Xa21k_17    | 74.922 | 88.07 | 88.8 | 9.1  | 1   | 1   |
| Xa21k_18    | 69.401 | 87.16 | 88.8 | 8    | 2.4 | 0.7 |
| Xa21k_19    | 60.568 | 81.96 | 87.1 | 9.8  | 2.4 | 0.7 |
| Xa21k_20    | 67.628 | 79.51 | 85   | 11.2 | 2.1 | 1.7 |
| Xa21k_21    | 66.139 | 69.72 | 81.5 | 15   | 2.8 | 0.7 |
| Xa21k_22    | 77.987 | 92.97 | 87.4 | 10.8 | 1   | 0.7 |
| Xa21k_23    | 67.628 | 79.51 | 85   | 11.2 | 2.1 | 1.7 |
| Xa21k_24    | 62.3   | 88.38 | 82.2 | 16.8 | 0.3 | 0.7 |
| Xa21k_25    | 75.786 | 85.93 | 86.4 | 10.5 | 1.4 | 1.7 |

|          |        |       |      |      |     |     |
|----------|--------|-------|------|------|-----|-----|
| Xa21k_26 | 68.671 | 77.06 | 88.8 | 7    | 3.1 | 1   |
| Xa21k_27 | 69.811 | 86.85 | 85.7 | 10.1 | 2.4 | 1.7 |
| Xa21k_28 | 68.889 | 79.2  | 82.9 | 14.7 | 1.7 | 0.7 |
| Xa21k_29 | 74.051 | 87.16 | 87.1 | 10.1 | 1.4 | 1.4 |
| Xa21k_30 | 67.089 | 89.6  | 88.8 | 9.8  | 0.7 | 0.7 |
| Xa21k_31 | 60.417 | 74.41 | 87.3 | 10.4 | 1.2 | 1.2 |

---

R/P ID, Region or Protein ID; MFR, Most Favoured Regions; AAR, Additionally Allowed Regions; GAR, Generously Allowed Regions; DR, Disallowed Regions; E, Error.



**Table S5A.** Binding free energy contribution of the key binding-site residues calculated from the binding energy decomposition for Xa21 (kJmol<sup>-1</sup>) of complex 1a and complex 3.

| Residues | MM Energy         | Polar Energy     | Apolar Energy   | Total Energy      |
|----------|-------------------|------------------|-----------------|-------------------|
| GLY-1    | -5.9687 ± 0.0086  | 0.0015 ± 0.0001  | 0.0000 ± 0.0000 | -5.9673 ± 0.0088  |
| GLY-1    | -6.6173 ± 0.0110  | 0.0013 ± 0.0000  | 0.0000 ± 0.0000 | -6.6161 ± 0.0111  |
| LYS-14   | -7.0653 ± 0.0099  | 0.0063 ± 0.0001  | 0.0000 ± 0.0000 | -7.0595 ± 0.0100  |
| LYS-14   | -8.1081 ± 0.0149  | 0.0017 ± 0.0001  | 0.0000 ± 0.0000 | -8.1064 ± 0.0151  |
| ARG-46   | -6.0954 ± 0.0079  | 0.0009 ± 0.0000  | 0.0000 ± 0.0000 | -6.0944 ± 0.0081  |
| ARG-46   | -6.3763 ± 0.0124  | 0.0003 ± 0.0000  | 0.0000 ± 0.0000 | -6.3765 ± 0.0119  |
| ARG-47   | -6.9610 ± 0.0162  | -0.0007 ± 0.0000 | 0.0000 ± 0.0000 | -6.9616 ± 0.0169  |
| ARG-47   | -7.7415 ± 0.0134  | 0.0016 ± 0.0001  | 0.0000 ± 0.0000 | -7.7399 ± 0.0131  |
| ARG-48   | -6.8459 ± 0.0124  | 0.0002 ± 0.0001  | 0.0000 ± 0.0000 | -6.8457 ± 0.0121  |
| ARG-48   | -6.8279 ± 0.0127  | -6.8279 ± 0.0127 | 0.0000 ± 0.0000 | -6.8281 ± 0.0130  |
| ARG-49   | -5.9652 ± 0.0092  | -0.0003 ± 0.0000 | 0.0000 ± 0.0000 | -5.9652 ± 0.0089  |
| ARG-49   | -6.0932 ± 0.0099  | -0.0000 ± 0.0000 | 0.0000 ± 0.0000 | -6.0934 ± 0.0097  |
| ARG-50   | -5.5553 ± 0.0070  | -0.0000 ± 0.0000 | 0.0000 ± 0.0000 | -5.5555 ± 0.0071  |
| ARG-50   | -5.7137 ± 0.0080  | -0.0000 ± 0.0000 | 0.0000 ± 0.0000 | -5.7136 ± 0.0082  |
| ARG-54   | -6.4122 ± 0.0072  | 0.0038 ± 0.0001  | 0.0000 ± 0.0000 | -6.4084 ± 0.0071  |
| ARG-54   | -6.8861 ± 0.0103  | 0.0038 ± 0.0001  | 0.0000 ± 0.0000 | -6.8820 ± 0.0101  |
| LYS-57   | -9.0314 ± 0.0137  | 0.0055 ± 0.0002  | 0.0000 ± 0.0000 | -9.0257 ± 0.0133  |
| LYS-57   | -8.7035 ± 0.0188  | -8.7035 ± 0.0188 | 0.0000 ± 0.0000 | -8.6975 ± 0.0188  |
| ARG-61   | -11.7671 ± 0.0208 | 0.0299 ± 0.0009  | 0.0000 ± 0.0000 | -11.7368 ± 0.0211 |
| ARG-61   | -12.0987 ± 0.0289 | 0.0007 ± 0.0011  | 0.0000 ± 0.0000 | -12.0966 ± 0.0287 |
| ARG-80   | -8.1822 ± 0.0129  | 0.0088 ± 0.0002  | 0.0000 ± 0.0000 | -8.1740 ± 0.0131  |
| ARG-80   | -7.7939 ± 0.0131  | 0.0094 ± 0.0003  | 0.0000 ± 0.0000 | -7.7846 ± 0.0129  |
| ARG-99   | -7.0884 ± 0.0101  | 0.0123 ± 0.0002  | 0.0000 ± 0.0000 | -7.0757 ± 0.0102  |
| ARG-99   | -8.1815 ± 0.0156  | 0.0061 ± 0.0002  | 0.0000 ± 0.0000 | -8.1758 ± 0.0151  |
| ARG-102  | -6.9704 ± 0.0080  | 0.0082 ± 0.0001  | 0.0000 ± 0.0000 | -6.9622 ± 0.0080  |
| ARG-102  | -7.3174 ± 0.0110  | 0.0070 ± 0.0002  | 0.0000 ± 0.0000 | -7.3110 ± 0.0108  |
| LYS-126  | -7.7376 ± 0.0109  | 0.0153 ± 0.0002  | 0.0000 ± 0.0000 | -7.7225 ± 0.0108  |
| LYS-126  | -7.7596 ± 0.0126  | 0.0143 ± 0.0004  | 0.0000 ± 0.0000 | -7.7452 ± 0.0123  |
| ARG-138  | -12.7486 ± 0.0406 | 0.1348 ± 0.0030  | 0.0000 ± 0.0000 | -12.6158 ± 0.0420 |
| ARG-138  | -15.9961 ± 0.0589 | 0.0159 ± 0.0031  | 0.0000 ± 0.0000 | -15.9806 ± 0.0598 |
| ARG-143  | -9.4608 ± 0.0172  | 0.0433 ± 0.0010  | 0.0000 ± 0.0000 | -9.4171 ± 0.0167  |
| ARG-143  | -10.4853 ± 0.0255 | 0.0920 ± 0.0027  | 0.0000 ± 0.0000 | -10.3915 ± 0.0251 |
| LYS-150  | -8.6361 ± 0.0148  | 0.0563 ± 0.0009  | 0.0000 ± 0.0000 | -8.5801 ± 0.0149  |
| LYS-150  | -8.1667 ± 0.0139  | 0.0326 ± 0.0007  | 0.0000 ± 0.0000 | -8.1342 ± 0.0140  |
| LYS-159  | -20.3711 ± 0.0853 | 0.4720 ± 0.0136  | 0.0000 ± 0.0000 | -19.8979 ± 0.0771 |
| LYS-159  | -24.6602 ± 0.1174 | 0.2545 ± 0.0190  | 0.0000 ± 0.0000 | -24.4097 ± 0.1063 |

|         |                   |                  |                  |                   |
|---------|-------------------|------------------|------------------|-------------------|
| PHE-183 | -0.8145 ± 0.0065  | 0.3040 ± 0.0067  | 0.0000 ± 0.0000  | -0.5109 ± 0.0066  |
| PHE-183 | -0.7919 ± 0.0085  | 0.1788 ± 0.0062  | -0.0028 ± 0.0005 | -0.6157 ± 0.0064  |
| ARG-185 | -16.1800 ± 0.1050 | 0.0717 ± 0.0202  | -0.0009 ± 0.0003 | -16.1082 ± 0.1047 |
| ARG-185 | -20.2474 ± 0.1126 | 0.2793 ± 0.0210  | -0.0003 ± 0.0003 | -19.9701 ± 0.1071 |
| ARG-225 | -14.1212 ± 0.0362 | 0.2711 ± 0.0035  | 0.0000 ± 0.0000  | -13.8508 ± 0.0342 |
| ARG-225 | -12.4740 ± 0.0454 | 0.1394 ± 0.0040  | 0.0000 ± 0.0000  | -12.3361 ± 0.0452 |
| ARG-230 | -51.2735 ± 0.3173 | 30.8192 ± 0.4278 | -0.4258 ± 0.0074 | -20.8768 ± 0.1632 |
| ARG-230 | -45.8491 ± 0.4546 | 26.7476 ± 0.4994 | -0.3229 ± 0.0068 | -19.4217 ± 0.1459 |
| LYS-233 | -25.3704 ± 0.2250 | 3.8871 ± 0.2018  | -0.0159 ± 0.0016 | -21.5039 ± 0.1351 |
| LYS-233 | -19.5911 ± 0.1327 | 0.9838 ± 0.0358  | 0.0000 ± 0.0000  | -18.6022 ± 0.1167 |
| LYS-244 | -10.8173 ± 0.0210 | 0.2516 ± 0.0029  | 0.0000 ± 0.0000  | -10.5651 ± 0.0190 |
| LYS-244 | -8.7742 ± 0.0230  | 0.0442 ± 0.0031  | 0.0000 ± 0.0000  | -8.7304 ± 0.0217  |
| ARG-258 | -23.3446 ± 0.1447 | 1.6989 ± 0.0749  | -0.0021 ± 0.0006 | -21.6513 ± 0.1107 |
| ARG-258 | -16.7439 ± 0.0917 | 0.5922 ± 0.0170  | 0.0000 ± 0.0000  | -16.1503 ± 0.0838 |
| LYS-262 | -13.2970 ± 0.0336 | 0.3120 ± 0.0065  | 0.0000 ± 0.0000  | -12.9841 ± 0.0292 |
| LYS-262 | -9.8426 ± 0.0371  | -0.2366 ± 0.0064 | 0.0000 ± 0.0000  | -10.0802 ± 0.0359 |
| ARG-293 | -11.5673 ± 0.0262 | 0.5609 ± 0.0067  | 0.0000 ± 0.0000  | -11.0069 ± 0.0210 |
| ARG-293 | -8.8897 ± 0.0250  | -0.0087 ± 0.0041 | 0.0000 ± 0.0000  | -8.8993 ± 0.0246  |
| ARG-295 | -11.8382 ± 0.0256 | 0.5212 ± 0.0068  | 0.0000 ± 0.0000  | -11.3179 ± 0.0217 |
| ARG-295 | -10.0747 ± 0.0287 | 0.0856 ± 0.0045  | 0.0000 ± 0.0000  | -9.9901 ± 0.0278  |
| TRP-303 | -35.7820 ± 0.0836 | 24.4156 ± 0.0511 | -1.9451 ± 0.0072 | -1.9451 ± 0.0072  |
| TRP-303 | -29.0365 ± 0.1575 | 17.9697 ± 0.1082 | -1.3214 ± 0.0084 | -12.3897 ± 0.0892 |
| ARG-304 | -44.8842 ± 0.3680 | 18.6848 ± 0.4557 | -0.6127 ± 0.0094 | -26.8115 ± 0.1772 |
| ARG-304 | -30.1770 ± 0.3256 | 11.2788 ± 0.4504 | -0.4571 ± 0.0105 | -19.3743 ± 0.2091 |
| ARG-310 | -11.7278 ± 0.0279 | 0.2678 ± 0.0051  | 0.0000 ± 0.0000  | -11.4595 ± 0.0236 |
| ARG-310 | -8.2929 ± 0.0343  | -0.1811 ± 0.0035 | 0.0000 ± 0.0000  | -8.4730 ± 0.0338  |
| LYS-326 | -14.6779 ± 0.0411 | 0.7315 ± 0.0092  | 0.0000 ± 0.0000  | -13.9471 ± 0.0348 |
| LYS-326 | -13.1947 ± 0.0415 | 0.1141 ± 0.0054  | 0.0000 ± 0.0000  | -13.0792 ± 0.0404 |
| LYS-368 | -9.2696 ± 0.0292  | 0.2457 ± 0.0062  | 0.0000 ± 0.0000  | -9.0227 ± 0.0245  |
| LYS-368 | -8.4412 ± 0.0274  | 0.0376 ± 0.0032  | 0.0000 ± 0.0000  | -8.4036 ± 0.0249  |
| TYR-380 | -17.6920 ± 0.1470 | 12.4566 ± 0.1215 | -1.4746 ± 0.0082 | -6.7080 ± 0.0751  |
| TYR-380 | -17.5009 ± 0.1034 | 13.7472 ± 0.0899 | -1.3689 ± 0.0075 | -5.1200 ± 0.0786  |
| ARG-387 | -10.6875 ± 0.0620 | 0.3596 ± 0.0126  | 0.0000 ± 0.0000  | -10.3284 ± 0.0500 |
| ARG-387 | -7.1987 ± 0.0565  | -0.2713 ± 0.0124 | 0.0000 ± 0.0000  | -7.4707 ± 0.0460  |
| ARG-396 | -10.3049 ± 0.0263 | 0.5441 ± 0.0081  | 0.0000 ± 0.0000  | -9.7604 ± 0.0214  |
| ARG-396 | -11.6806 ± 0.0288 | 0.5808 ± 0.0069  | 0.0000 ± 0.0000  | -11.0986 ± 0.0258 |
| LYS-398 | -15.4063 ± 0.0680 | 1.0771 ± 0.0189  | 0.0000 ± 0.0000  | -14.3305 ± 0.0528 |
| LYS-398 | -15.6341 ± 0.0597 | 1.2213 ± 0.0166  | 0.0000 ± 0.0000  | -14.4128 ± 0.0544 |

|         |                   |                  |                  |                   |
|---------|-------------------|------------------|------------------|-------------------|
| LEU-404 | -5.9956 ± 0.0290  | 0.0654 ± 0.0063  | -0.5861 ± 0.0045 | -6.5164 ± 0.0286  |
| LEU-404 | -7.3450 ± 0.0381  | 0.1033 ± 0.0064  | -0.6953 ± 0.0047 | -7.9384 ± 0.0405  |
| LYS-433 | -8.4102 ± 0.0782  | -0.1268 ± 0.0177 | 0.0000 ± 0.0000  | -8.5422 ± 0.0622  |
| LYS-433 | -5.4489 ± 0.0675  | -0.5965 ± 0.0161 | 0.0000 ± 0.0000  | -6.0441 ± 0.0551  |
| ARG-522 | -5.7350 ± 0.1159  | -2.1403 ± 0.0406 | -0.0091 ± 0.0014 | -7.8838 ± 0.1036  |
| ARG-522 | -15.9112 ± 0.0918 | -0.1566 ± 0.0236 | -0.0008 ± 0.0004 | -16.0673 ± 0.0839 |
| PRO-608 | 6.1284 ± 0.0213   | 0.0269 ± 0.0005  | 0.0000 ± 0.0000  | 6.1555 ± 0.0216   |
| PRO-608 | 6.9141 ± 0.0275   | 0.0034 ± 0.0003  | 0.0000 ± 0.0000  | 6.9174 ± 0.0278   |

Green markings represent residues showing higher interaction values; Yellow markings represent residues showing average interaction values.

**Table S5B.** Binding free energy contribution of the key binding-site residues calculated from the binding energy decomposition for Xa21 (kJmol<sup>-1</sup>) of complex 1b and complex 2.

| Residues | MM Energy         | Polar Energy    | Apolar Energy    | Total Energy      |
|----------|-------------------|-----------------|------------------|-------------------|
| GLY-1    | -9.7687 ± 0.0477  | 0.0551 ± 0.0374 | 0.0004 ± 0.0011  | -9.7131 ± 0.0613  |
| GLY-1    | -7.5079 ± 0.0301  | 0.1413 ± 0.0351 | -0.0025 ± 0.0020 | -7.3705 ± 0.0457  |
| LYS-14   | -13.2228 ± 0.0361 | 0.1253 ± 0.0151 | 0.0040 ± 0.0023  | -13.0940 ± 0.0397 |
| LYS-14   | -12.7693 ± 0.0555 | 1.1321 ± 0.0321 | 0.0015 ± 0.0027  | -11.6347 ± 0.0530 |
| ARG-46   | -8.7174 ± 0.0210  | 0.0420 ± 0.0153 | -0.0010 ± 0.0034 | -8.6771 ± 0.0268  |
| ARG-46   | -7.9087 ± 0.0231  | 0.0626 ± 0.0178 | -0.0027 ± 0.0026 | -7.8475 ± 0.0293  |
| ARG-47   | -10.6854 ± 0.0529 | 0.0389 ± 0.0182 | 0.0016 ± 0.0025  | -10.6396 ± 0.0568 |
| ARG-47   | -9.7357 ± 0.0387  | 0.1075 ± 0.0182 | -0.0010 ± 0.0034 | -9.6296 ± 0.0430  |
| ARG-48   | -10.6700 ± 0.0354 | 0.0453 ± 0.0183 | 0.0035 ± 0.0029  | -10.6213 ± 0.0391 |
| ARG-48   | -7.3358 ± 0.0293  | 0.0272 ± 0.0192 | 0.0024 ± 0.0025  | -7.3062 ± 0.0351  |
| ARG-49   | -8.1130 ± 0.0235  | 0.0321 ± 0.0192 | 0.0003 ± 0.0021  | -8.0799 ± 0.0299  |
| ARG-49   | -6.1361 ± 0.0236  | 0.0446 ± 0.0203 | 0.0001 ± 0.0017  | -6.0928 ± 0.0305  |
| ARG-50   | -7.2799 ± 0.0188  | 0.0055 ± 0.0177 | -0.0016 ± 0.0017 | -7.2757 ± 0.0258  |
| ARG-50   | -6.1409 ± 0.0224  | 0.0311 ± 0.0196 | 0.0030 ± 0.0020  | -6.1063 ± 0.0287  |
| ARG-54   | -9.7234 ± 0.0181  | 0.0734 ± 0.0167 | -0.0057 ± 0.0025 | -9.6553 ± 0.0247  |
| ARG-54   | -8.4683 ± 0.0269  | 0.1564 ± 0.0186 | -0.0045 ± 0.0032 | -8.3167 ± 0.0317  |
| LYS-57   | -15.9923 ± 0.0486 | 0.1749 ± 0.0320 | 0.0013 ± 0.0028  | -15.8120 ± 0.0575 |
| LYS-57   | -15.8912 ± 0.0428 | 0.7352 ± 0.0342 | -0.0093 ± 0.0031 | -15.1653 ± 0.0514 |
| ARG-61   | -27.2170 ± 0.0696 | 1.1002 ± 0.0183 | 0.0005 ± 0.0032  | -26.1161 ± 0.0670 |
| ARG-61   | -23.5408 ± 0.0673 | 1.8516 ± 0.0280 | -0.0004 ± 0.0021 | -21.6908 ± 0.0631 |
| ARG-80   | -13.1232 ± 0.0303 | 0.1285 ± 0.0147 | -0.0006 ± 0.0023 | -12.9947 ± 0.0328 |
| ARG-80   | -10.9371 ± 0.0295 | 0.3749 ± 0.0153 | -0.0028 ± 0.0026 | -10.5658 ± 0.0311 |
| ARG-99   | -12.8909 ± 0.0278 | 0.1415 ± 0.0157 | 0.0030 ± 0.0022  | -12.7473 ± 0.0316 |
| ARG-99   | -8.8306 ± 0.0444  | 0.1862 ± 0.0175 | 0.0012 ± 0.0028  | -8.6446 ± 0.0450  |
| ARG-102  | -10.9864 ± 0.0197 | 0.1216 ± 0.0162 | -0.0030 ± 0.0022 | -10.8691 ± 0.0253 |
| ARG-102  | -10.7391 ± 0.0396 | 0.3819 ± 0.0176 | -0.0023 ± 0.0027 | -10.3588 ± 0.0387 |

|         |                    |                  |                  |                   |
|---------|--------------------|------------------|------------------|-------------------|
| LYS-126 | -12.0785 ± 0.0219  | 0.1093 ± 0.0350  | -0.0044 ± 0.0026 | -11.9721 ± 0.0409 |
| LYS-126 | -10.7144 ± 0.0278  | 0.2339 ± 0.0350  | -0.0017 ± 0.0027 | -10.4822 ± 0.0420 |
| ARG-138 | -60.8613 ± 0.3245  | 12.7899 ± 0.3309 | -0.4855 ± 0.0125 | -48.5570 ± 0.1529 |
| ARG-138 | -49.5846 ± 0.5068  | 22.8854 ± 0.4595 | -0.9228 ± 0.0164 | -27.6154 ± 0.2646 |
| ARG-143 | -16.7600 ± 0.0606  | 0.0757 ± 0.0182  | 0.0025 ± 0.0019  | -16.6808 ± 0.0643 |
| ARG-143 | -13.3313 ± 0.0719  | 0.4140 ± 0.0186  | -0.0012 ± 0.0029 | -12.9194 ± 0.0750 |
| LYS-150 | -13.0782 ± 0.0282  | 0.1741 ± 0.0336  | -0.0002 ± 0.0025 | -12.9043 ± 0.0425 |
| LYS-150 | -9.8829 ± 0.0297   | 0.2478 ± 0.0338  | -0.0023 ± 0.0023 | -9.6369 ± 0.0439  |
| LYS-159 | -73.7898 ± 0.3612  | 54.5355 ± 0.6430 | -1.1879 ± 0.0091 | -20.4579 ± 0.3622 |
| LYS-159 | -91.6969 ± 0.3070  | 75.9152 ± 0.6604 | -1.7192 ± 0.0106 | -17.4810 ± 0.4501 |
| PHE-183 | -13.6334 ± 0.0724  | 4.4258 ± 0.0718  | -2.2752 ± 0.0075 | -11.4786 ± 0.0552 |
| PHE-183 | -15.3290 ± 0.0619  | 8.0958 ± 0.0418  | -2.0325 ± 0.0088 | -9.2657 ± 0.0619  |
| ARG-185 | -113.5355 ± 0.5004 | 88.6535 ± 0.4657 | -2.6790 ± 0.0145 | -27.5459 ± 0.2336 |
| ARG-185 | -74.7709 ± 0.4661  | 58.1120 ± 0.6605 | -1.8893 ± 0.0163 | -18.5529 ± 0.2538 |
| ARG-225 | -17.6968 ± 0.0623  | -0.0072 ± 0.0153 | -0.0004 ± 0.0023 | -17.7024 ± 0.0654 |
| ARG-225 | -17.9356 ± 0.0651  | 0.1791 ± 0.0164  | 0.0061 ± 0.0034  | -17.7503 ± 0.0659 |
| ARG-230 | -37.4765 ± 0.2447  | 4.4832 ± 0.2574  | -0.1962 ± 0.0080 | -33.1992 ± 0.1140 |
| ARG-230 | -39.5601 ± 0.1824  | 9.1658 ± 0.1995  | -0.1078 ± 0.0049 | -30.5009 ± 0.1469 |
| LYS-233 | -31.9923 ± 0.2901  | 2.9629 ± 0.2473  | -0.0813 ± 0.0046 | -29.1132 ± 0.1918 |
| LYS-233 | -19.4239 ± 0.1366  | 0.3268 ± 0.0549  | -0.0026 ± 0.0021 | -19.0988 ± 0.1230 |
| LYS-244 | -9.1315 ± 0.0192   | 0.0687 ± 0.0366  | -0.0037 ± 0.0027 | -9.0665 ± 0.0431  |
| LYS-244 | -7.7724 ± 0.0322   | 0.0699 ± 0.0368  | -0.0010 ± 0.0031 | -7.7030 ± 0.0477  |
| ARG-258 | -17.3387 ± 0.1255  | -0.3142 ± 0.0374 | -0.0019 ± 0.0027 | -17.6526 ± 0.1205 |
| ARG-258 | -16.1880 ± 0.1022  | 0.3972 ± 0.0434  | -0.0033 ± 0.0024 | -15.7961 ± 0.0937 |
| LYS-262 | -8.0191 ± 0.0282   | 0.0078 ± 0.0362  | -0.0031 ± 0.0029 | -8.0134 ± 0.0471  |
| LYS-262 | -6.8243 ± 0.0348   | 0.0015 ± 0.0369  | -0.0012 ± 0.0038 | -6.8230 ± 0.0501  |
| ARG-293 | -8.1288 ± 0.0219   | 0.0178 ± 0.0148  | -0.0036 ± 0.0028 | -8.1146 ± 0.0271  |
| ARG-293 | -7.4879 ± 0.0309   | -0.0379 ± 0.0152 | 0.0026 ± 0.0038  | -7.5227 ± 0.0319  |
| ARG-295 | -9.0904 ± 0.0235   | 0.0002 ± 0.0156  | 0.0001 ± 0.0023  | -9.0921 ± 0.0280  |
| ARG-295 | -9.5394 ± 0.0308   | 0.0043 ± 0.0176  | 0.0037 ± 0.0029  | -9.5315 ± 0.0350  |
| TRP-303 | -0.8300 ± 0.0061   | -0.0050 ± 0.0070 | -0.0006 ± 0.0024 | -0.8357 ± 0.0100  |
| TRP-303 | 0.2776 ± 0.0173    | -0.2211 ± 0.0131 | 0.0018 ± 0.0024  | 0.0580 ± 0.0133   |
| ARG-304 | -6.4413 ± 0.1145   | -0.5703 ± 0.0485 | -0.0017 ± 0.0020 | -7.0067 ± 0.1053  |
| ARG-304 | -9.9707 ± 0.0927   | -0.3307 ± 0.0196 | 0.0001 ± 0.0024  | -10.2977 ± 0.0899 |
| ARG-310 | -6.3695 ± 0.0226   | 0.0136 ± 0.0165  | -0.0007 ± 0.0027 | -6.3562 ± 0.0276  |
| ARG-310 | -6.0378 ± 0.0236   | 0.0127 ± 0.0155  | 0.0068 ± 0.0029  | -6.0196 ± 0.0280  |
| LYS-326 | -12.4760 ± 0.0391  | 0.0166 ± 0.0333  | -0.0036 ± 0.0026 | -12.4629 ± 0.0522 |
| LYS-326 | -14.4390 ± 0.0570  | -0.0933 ± 0.0350 | -0.0013 ± 0.0029 | -14.5316 ± 0.0653 |

|                |                   |                  |                  |                   |
|----------------|-------------------|------------------|------------------|-------------------|
| <b>LYS-368</b> | -4.9048 ± 0.0218  | 0.0424 ± 0.0357  | 0.0012 ± 0.0020  | -4.8615 ± 0.0419  |
| <b>LYS-368</b> | -5.6806 ± 0.0319  | 0.0640 ± 0.0339  | -0.0016 ± 0.0026 | -5.6164 ± 0.0459  |
| <b>TYR-380</b> | -0.0417 ± 0.0044  | 0.0071 ± 0.0093  | 0.0010 ± 0.0025  | -0.0333 ± 0.0109  |
| <b>TYR-380</b> | -1.1177 ± 0.0377  | 0.6878 ± 0.0470  | -0.0535 ± 0.0035 | -0.4825 ± 0.0217  |
| <b>ARG-387</b> | -3.6936 ± 0.0291  | 0.0355 ± 0.0161  | 0.0004 ± 0.0022  | -3.6592 ± 0.0338  |
| <b>ARG-387</b> | -4.2876 ± 0.0465  | -0.0777 ± 0.0161 | 0.0009 ± 0.0021  | -4.3656 ± 0.0470  |
| <b>ARG-396</b> | -7.1893 ± 0.0237  | 0.0282 ± 0.0166  | 0.0009 ± 0.0026  | -7.1616 ± 0.0294  |
| <b>ARG-396</b> | -7.7624 ± 0.0312  | -0.0491 ± 0.0173 | 0.0049 ± 0.0028  | -7.8072 ± 0.0351  |
| <b>LYS-398</b> | -11.9927 ± 0.0495 | 0.0646 ± 0.0333  | -0.0044 ± 0.0024 | -11.9305 ± 0.0580 |
| <b>LYS-398</b> | -9.1156 ± 0.0365  | -9.1156 ± 0.0365 | 0.0052 ± 0.0025  | -9.1836 ± 0.0489  |
| <b>LEU-404</b> | -0.1325 ± 0.0014  | -0.0008 ± 0.0024 | 0.0015 ± 0.0024  | -0.1319 ± 0.0037  |
| <b>LEU-404</b> | -0.5346 ± 0.0064  | 0.0512 ± 0.0027  | -0.0045 ± 0.0027 | -0.4880 ± 0.0061  |
| <b>LYS-433</b> | -2.7775 ± 0.0368  | 0.0212 ± 0.0322  | 0.0031 ± 0.0026  | -2.7561 ± 0.0494  |
| <b>LYS-433</b> | -3.7705 ± 0.0586  | 0.0964 ± 0.0254  | -0.0013 ± 0.0017 | -3.6767 ± 0.0637  |
| <b>ARG-522</b> | -26.6830 ± 0.3555 | 16.4826 ± 0.4122 | -0.6542 ± 0.0112 | -10.8558 ± 0.1752 |
| <b>ARG-522</b> | -72.0310 ± 0.5148 | 73.5158 ± 0.5014 | -1.9091 ± 0.0136 | -0.4415 ± 0.3213  |
| <b>PRO-608</b> | -22.3819 ± 0.4220 | 4.0357 ± 0.2917  | -0.0727 ± 0.0058 | -18.4335 ± 0.2748 |
| <b>PRO-608</b> | -4.4437 ± 0.1578  | 0.2507 ± 0.0439  | 0.0002 ± 0.0024  | -4.1905 ± 0.1637  |

Green markings represent residues showing higher interaction values; Yellow markings represent residues showing average interaction values.

**Table S5C.** Binding free energy contribution of the key binding-site residues calculated from the binding energy decomposition for RaxX21-sY (kJmol<sup>-1</sup>) of complex 1a and complex 3.

| Residues      | MM Energy         | Polar Energy     | Apolar Energy    | Total Energy      |
|---------------|-------------------|------------------|------------------|-------------------|
| <b>VAL-2</b>  | -24.6045 ± 0.1332 | 12.6492 ± 0.1220 | -1.5783 ± 0.0093 | -13.5344 ± 0.0765 |
| <b>VAL-2</b>  | -13.0105 ± 0.1020 | 7.0837 ± 0.0886  | -0.5546 ± 0.0079 | -6.4884 ± 0.0514  |
| <b>GLY-3</b>  | -13.6600 ± 0.1274 | 8.9606 ± 0.1514  | -1.4675 ± 0.0076 | -6.1731 ± 0.0591  |
| <b>GLY-3</b>  | -16.0877 ± 0.1713 | 12.1984 ± 0.1730 | -1.0387 ± 0.0132 | -4.9325 ± 0.0554  |
| <b>PRO-14</b> | -13.3340 ± 0.0830 | 5.3404 ± 0.0618  | -1.2992 ± 0.0104 | -9.2938 ± 0.0723  |
| <b>PRO-14</b> | -18.7857 ± 0.1110 | 7.9902 ± 0.0944  | -1.8124 ± 0.0082 | -12.6051 ± 0.0563 |
| <b>LYS-15</b> | -88.6216 ± 0.4083 | 81.5238 ± 0.7059 | -2.6593 ± 0.0128 | -9.7518 ± 0.4931  |
| <b>LYS-15</b> | -65.9948 ± 0.3908 | 53.6579 ± 0.7919 | -2.0346 ± 0.0109 | -14.3603 ± 0.5324 |

Green markings represent residues showing higher interaction values; Yellow markings represent residues showing average interaction values.

**Table S5D.** Binding free energy contribution of the key binding-site residues calculated from the binding energy decomposition for OsSERK2 ( $\text{kJmol}^{-1}$ ) of complex 1b and complex 2.

| Residues | MM Energy         | Polar Energy     | Apolar Energy    | Total Energy      |
|----------|-------------------|------------------|------------------|-------------------|
| LYS-46   | 20.2439 ± 0.2959  | -0.6592 ± 0.1510 | -0.0167 ± 0.0039 | 19.5717 ± 0.2614  |
| LYS-46   | -15.7543 ± 0.3780 | 3.4063 ± 0.2380  | -0.1518 ± 0.0063 | -12.4987 ± 0.2876 |
| ASP-47   | -47.8659 ± 0.2763 | 22.9919 ± 0.2677 | -0.0552 ± 0.0039 | -24.9359 ± 0.1862 |
| ASP-47   | -16.3727 ± 0.2586 | 0.0132 ± 0.1916  | -0.0054 ± 0.0031 | -16.3583 ± 0.1525 |
| LEU-59   | -8.3827 ± 0.0711  | 0.0982 ± 0.0334  | -1.2386 ± 0.0090 | -9.5206 ± 0.0585  |
| LEU-59   | -4.8219 ± 0.0675  | 0.1678 ± 0.0182  | -0.5323 ± 0.0122 | -5.1878 ± 0.0849  |
| ASP-80   | -23.5021 ± 0.2628 | 5.3938 ± 0.1197  | 0.0047 ± 0.0045  | -18.1082 ± 0.1873 |
| ASP-80   | -40.5096 ± 0.2140 | 10.5007 ± 0.1642 | -0.0024 ± 0.0043 | -30.0019 ± 0.1448 |
| PHE-137  | -13.6270 ± 0.0961 | 4.9343 ± 0.0622  | -1.6782 ± 0.0128 | -10.3732 ± 0.0657 |
| PHE-137  | -24.0051 ± 0.2385 | 14.2520 ± 0.1632 | -1.4993 ± 0.0222 | -11.2639 ± 0.1178 |
| LYS-164  | -85.3566 ± 0.6218 | 63.6532 ± 0.9761 | -0.6962 ± 0.0122 | -22.4333 ± 0.4886 |
| LYS-164  | -53.8833 ± 0.6652 | 28.6518 ± 0.7936 | -0.6757 ± 0.0153 | -25.9628 ± 0.3910 |
| LYS-183  | -56.9942 ± 0.4190 | 6.9810 ± 0.2642  | -0.0728 ± 0.0063 | -50.0972 ± 0.2914 |
| LYS-183  | -42.8270 ± 0.4131 | 10.7269 ± 0.4008 | -0.1961 ± 0.0093 | -32.3350 ± 0.2338 |
| ARG-192  | -18.2370 ± 0.1072 | 0.9081 ± 0.0294  | -0.0042 ± 0.0049 | -17.3383 ± 0.1031 |
| ARG-192  | -18.2371 ± 0.2376 | 1.3801 ± 0.0571  | -0.0050 ± 0.0048 | -16.8526 ± 0.2047 |
| ARG-212  | -51.5250 ± 0.4645 | 8.0290 ± 0.3351  | -0.2861 ± 0.0124 | -43.7914 ± 0.2648 |
| ARG-212  | -34.6025 ± 0.3026 | 2.0019 ± 0.0980  | -0.0222 ± 0.0051 | -32.6356 ± 0.2480 |
| ARG-218  | -14.9573 ± 0.1097 | 0.5054 ± 0.0249  | -0.0056 ± 0.0045 | -14.4520 ± 0.1065 |
| ARG-218  | -15.4568 ± 0.1678 | 0.6392 ± 0.0271  | -0.0000 ± 0.0050 | -14.8206 ± 0.1576 |
| LYS-222  | -8.8753 ± 0.0885  | 0.3428 ± 0.0542  | 0.0018 ± 0.0043  | -8.5338 ± 0.1009  |
| LYS-222  | -7.5329 ± 0.1065  | 0.5910 ± 0.0484  | 0.0029 ± 0.0041  | -6.9419 ± 0.1145  |
| LYS-232  | -6.4713 ± 0.0955  | 0.2985 ± 0.0473  | -0.0015 ± 0.0053 | -6.1758 ± 0.1048  |
| LYS-232  | -0.0178 ± 0.0810  | 0.5993 ± 0.0478  | 0.0012 ± 0.0059  | 0.5819 ± 0.0915   |
| LYS-238  | -11.9570 ± 0.1207 | 0.1138 ± 0.0472  | -0.0023 ± 0.0047 | -11.8461 ± 0.1287 |
| LYS-238  | -6.7402 ± 0.1094  | 0.3987 ± 0.0503  | 0.0018 ± 0.0052  | -6.3363 ± 0.1185  |

Green markings represent residues showing higher interaction values; Yellow markings represent residues showing average interaction values.

**Table S6A:** Protein-Protein Main Chain-Side Chain Hydrogen Bonds of complex 1.

| Before Simulation                                    |       |     |      |          |       |     |      |      |
|------------------------------------------------------|-------|-----|------|----------|-------|-----|------|------|
| Protein-Protein Main Chain-Side Chain Hydrogen Bonds |       |     |      |          |       |     |      |      |
| DONOR                                                |       |     |      | ACCEPTOR |       |     |      |      |
| POS                                                  | CHAIN | RES | ATOM | POS      | CHAIN | RES | ATOM | Dd-a |
| 62                                                   | A     | SER | OG   | 72       | C     | PRO | O    | 3.18 |
| 86                                                   | A     | ASP | OD2  | 71       | C     | ASN | O    | 3.46 |
| 86                                                   | A     | ASP | OD2  | 71       | C     | ASN | O    | 3.46 |
| 110                                                  | A     | ASP | OD2  | 63       | C     | CYS | O    | 2.78 |
| 110                                                  | A     | ASP | OD2  | 63       | C     | CYS | O    | 2.78 |
| 134                                                  | A     | HIS | NE2  | 63       | C     | CYS | O    | 3.19 |
| 134                                                  | A     | HIS | ND1  | 64       | C     | THR | O    | 3.17 |
| 134                                                  | A     | HIS | ND1  | 65       | C     | TRP | O    | 2.68 |
| 134                                                  | A     | HIS | NE2  | 65       | C     | TRP | O    | 2.05 |
| 134                                                  | A     | HIS | NE2  | 68       | C     | VAL | O    | 3.08 |
| 159                                                  | A     | LYS | NZ   | 65       | C     | TRP | O    | 3.4  |
| 159                                                  | A     | LYS | NZ   | 66       | C     | PHE | O    | 3.37 |
| 207                                                  | A     | GLN | OE1  | 53       | C     | GLN | O    | 2.01 |
| 207                                                  | A     | GLN | OE1  | 53       | C     | GLN | O    | 2.01 |
| 331                                                  | A     | ASN | ND2  | 1        | B     | HIS | O    | 2.33 |
| 331                                                  | A     | ASN | ND2  | 1        | B     | HIS | O    | 2.33 |
| 567                                                  | A     | THR | N    | 140      | C     | GLU | OE1  | 3.34 |
| 567                                                  | A     | THR | N    | 140      | C     | GLU | OE2  | 1.63 |
| 568                                                  | A     | MET | N    | 140      | C     | GLU | OE2  | 3    |
| 4                                                    | B     | GLY | N    | 301      | A     | TYR | OH   | 3.4  |
| 11                                                   | B     | GLY | N    | 93       | C     | GLN | NE2  | 2.59 |
| 16                                                   | B     | HIS | NE2  | 43       | C     | GLN | O    | 2.5  |
| 21                                                   | B     | ARG | N    | 39       | C     | TYR | OH   | 3.03 |
| 21                                                   | B     | ARG | N    | 43       | C     | GLN | OE1  | 2.25 |
| 21                                                   | B     | ARG | N    | 43       | C     | GLN | NE2  | 2.89 |
| 36                                                   | C     | ASP | OD1  | 8        | B     | PRO | O    | 3.26 |
| 36                                                   | C     | ASP | OD1  | 8        | B     | PRO | O    | 3.26 |
| 39                                                   | C     | TYR | OH   | 6        | B     | ASP | O    | 1.86 |
| 40                                                   | C     | SER | OG   | 10       | B     | PRO | O    | 2.06 |
| 42                                                   | C     | ARG | NE   | 21       | B     | ARG | O    | 2.91 |
| 43                                                   | C     | GLN | NE2  | 6        | B     | ASP | O    | 3.34 |
| 43                                                   | C     | GLN | NE2  | 6        | B     | ASP | O    | 3.34 |

|     |   |     |     |     |   |     |     |      |
|-----|---|-----|-----|-----|---|-----|-----|------|
| 43  | C | GLN | OE1 | 21  | B | ARG | O   | 3.09 |
| 43  | C | GLN | OE1 | 21  | B | ARG | O   | 3.09 |
| 43  | C | GLN | OE1 | 21  | B | ARG | OXT | 3.19 |
| 43  | C | GLN | OE1 | 21  | B | ARG | OXT | 3.19 |
| 65  | C | TRP | N   | 134 | A | HIS | NE2 | 2.92 |
| 66  | C | PHE | N   | 134 | A | HIS | ND1 | 3.36 |
| 116 | C | ASN | ND2 | 544 | A | GLY | O   | 2.47 |
| 116 | C | ASN | ND2 | 544 | A | GLY | O   | 2.47 |
| 140 | C | GLU | OE1 | 565 | A | ASP | O   | 3.12 |
| 140 | C | GLU | OE1 | 565 | A | ASP | O   | 3.12 |
| 140 | C | GLU | OE2 | 565 | A | ASP | O   | 3.5  |
| 140 | C | GLU | OE2 | 565 | A | ASP | O   | 3.5  |

After Simulation

Protein-Protein Main Chain-Side Chain Hydrogen Bonds

| DONOR |       |     |      | ACCEPTOR |       |     |      | Dd-a |
|-------|-------|-----|------|----------|-------|-----|------|------|
| POS   | CHAIN | RES | ATOM | POS      | CHAIN | RES | ATOM |      |
| 185   | A     | ARG | NH2  | 52       | C     | LEU | O    | 3.36 |
| 185   | A     | ARG | NH2  | 52       | C     | LEU | O    | 3.36 |
| 303   | A     | TRP | NE1  | 1        | B     | HIS | O    | 3.06 |
| 303   | A     | TRP | NE1  | 4        | B     | GLY | O    | 3.00 |
| 331   | A     | ASN | ND2  | 2        | B     | VAL | O    | 2.97 |
| 331   | A     | ASN | ND2  | 2        | B     | VAL | O    | 2.97 |
| 382   | A     | CYS | SG   | 15       | B     | LYS | O    | 3.90 |
| 544   | A     | GLY | N    | 116      | C     | ASN | ND2  | 3.43 |
| 567   | A     | THR | N    | 140      | C     | GLU | OE1  | 3.10 |
| 567   | A     | THR | N    | 140      | C     | GLU | OE2  | 2.91 |
| 568   | A     | MET | N    | 140      | C     | GLU | OE1  | 2.94 |
| 1     | B     | HIS | N    | 334      | A     | GLU | OE1  | 3.06 |
| 1     | B     | HIS | N    | 334      | A     | GLU | OE2  | 3.38 |
| 1     | B     | HIS | N    | 358      | A     | GLU | OE2  | 2.94 |
| 2     | B     | VAL | N    | 358      | A     | GLU | OE2  | 3.43 |
| 6     | B     | ASP | N    | 279      | A     | TYR | OH   | 2.73 |
| 53    | C     | GLN | NE2  | 183      | A     | PHE | O    | 2.84 |
| 53    | C     | GLN | NE2  | 183      | A     | PHE | O    | 2.84 |
| 53    | C     | GLN | OE1  | 184      | A     | ASN | O    | 3.07 |
| 53    | C     | GLN | OE1  | 184      | A     | ASN | O    | 3.07 |

Pos, Position; Res, Residue; Dd-a, Distance between donor atom and acceptor atom; Red colored residues are hot residues; Green color indicates sustained bonds after simulation; Bold residues are sustained residues after simulation.



**Table S 6b:** Protein-Protein Side Chain-Side Chain Hydrogen Bonds from complex 1

| Before Simulation                                    |       |     |      |          |       |     |      |      |
|------------------------------------------------------|-------|-----|------|----------|-------|-----|------|------|
| Protein-Protein Side Chain-Side Chain Hydrogen Bonds |       |     |      |          |       |     |      |      |
| DONOR                                                |       |     |      | ACCEPTOR |       |     |      |      |
| POS                                                  | CHAIN | RES | ATOM | POS      | CHAIN | RES | ATOM | Dd-a |
| 207                                                  | A     | GLN | OE1  | 53       | C     | GLN | NE2  | 2.83 |
| 207                                                  | A     | GLN | OE1  | 53       | C     | GLN | NE2  | 2.83 |
| 230                                                  | A     | ARG | NH2  | 56       | C     | ASP | OD2  | 2.5  |
| 230                                                  | A     | ARG | NH2  | 56       | C     | ASP | OD2  | 2.5  |
| 231                                                  | A     | GLU | OE1  | 53       | C     | GLN | OE1  | 3.09 |
| 231                                                  | A     | GLU | OE1  | 53       | C     | GLN | OE1  | 3.09 |
| 231                                                  | A     | GLU | OE1  | 53       | C     | GLN | NE2  | 2.7  |
| 231                                                  | A     | GLU | OE1  | 53       | C     | GLN | NE2  | 2.7  |
| 231                                                  | A     | GLU | OE2  | 53       | C     | GLN | OE1  | 1.69 |
| 231                                                  | A     | GLU | OE2  | 53       | C     | GLN | OE1  | 1.69 |
| 231                                                  | A     | GLU | OE2  | 53       | C     | GLN | NE2  | 2.24 |
| 231                                                  | A     | GLU | OE2  | 53       | C     | GLN | NE2  | 2.24 |
| 279                                                  | A     | TYR | OH   | 6        | B     | ASP | OD1  | 3.34 |
| 279                                                  | A     | TYR | OH   | 6        | B     | ASP | OD2  | 3.15 |
| 358                                                  | A     | GLU | OE1  | 1        | B     | HIS | ND1  | 3.06 |
| 358                                                  | A     | GLU | OE1  | 1        | B     | HIS | ND1  | 3.06 |
| 522                                                  | A     | ARG | NH1  | 117      | C     | GLU | OE1  | 2.98 |
| 522                                                  | A     | ARG | NH1  | 117      | C     | GLU | OE1  | 2.98 |
| 546                                                  | A     | GLU | OE2  | 116      | C     | ASN | ND2  | 3.28 |
| 546                                                  | A     | GLU | OE2  | 116      | C     | ASN | ND2  | 3.28 |
| 567                                                  | A     | THR | OG1  | 140      | C     | GLU | OE1  | 2.36 |
| 567                                                  | A     | THR | OG1  | 140      | C     | GLU | OE2  | 2.27 |
| 1                                                    | B     | HIS | ND1  | 358      | A     | GLU | OE1  | 3.06 |
| 15                                                   | B     | LYS | NZ   | 383      | A     | ASN | OD1  | 2.99 |
| 15                                                   | B     | LYS | NZ   | 383      | A     | ASN | ND2  | 2.63 |
| 21                                                   | B     | ARG | NH2  | 231      | A     | GLU | OE1  | 2.1  |
| 21                                                   | B     | ARG | NH2  | 231      | A     | GLU | OE1  | 2.1  |
| 21                                                   | B     | ARG | NH1  | 279      | A     | TYR | OH   | 3.38 |
| 21                                                   | B     | ARG | NH1  | 279      | A     | TYR | OH   | 3.38 |
| 53                                                   | C     | GLN | NE2  | 207      | A     | GLN | OE1  | 2.83 |
| 53                                                   | C     | GLN | NE2  | 207      | A     | GLN | OE1  | 2.83 |
| 53                                                   | C     | GLN | OE1  | 231      | A     | GLU | OE1  | 3.09 |
| 53                                                   | C     | GLN | OE1  | 231      | A     | GLU | OE1  | 3.09 |

|     |   |     |     |     |   |     |     |      |
|-----|---|-----|-----|-----|---|-----|-----|------|
| 53  | C | GLN | OE1 | 231 | A | GLU | OE2 | 1.69 |
| 53  | C | GLN | OE1 | 231 | A | GLU | OE2 | 1.69 |
| 53  | C | GLN | NE2 | 231 | A | GLU | OE1 | 2.7  |
| 53  | C | GLN | NE2 | 231 | A | GLU | OE1 | 2.7  |
| 53  | C | GLN | NE2 | 231 | A | GLU | OE2 | 2.24 |
| 53  | C | GLN | NE2 | 231 | A | GLU | OE2 | 2.24 |
| 113 | C | THR | OG1 | 546 | A | GLU | OE1 | 3.48 |
| 116 | C | ASN | ND2 | 546 | A | GLU | OE2 | 3.28 |
| 116 | C | ASN | ND2 | 546 | A | GLU | OE2 | 3.28 |
| 116 | C | ASN | OD1 | 568 | A | MET | SD  | 1.15 |
| 116 | C | ASN | OD1 | 568 | A | MET | SD  | 1.15 |
| 116 | C | ASN | ND2 | 568 | A | MET | SD  | 2.66 |
| 116 | C | ASN | ND2 | 568 | A | MET | SD  | 2.66 |

**After Simulation**

**Protein-Protein Side Chain-Side Chain Hydrogen Bonds**

| DONOR      |          |            |            | ACCEPTOR   |          |            |            | Dd-a |
|------------|----------|------------|------------|------------|----------|------------|------------|------|
| POS        | CHAIN    | RES        | ATOM       | POS        | CHAIN    | RES        | ATOM       |      |
| 209        | A        | ASN        | ND2        | 50         | C        | ASN        | OD1        | 2.83 |
| 209        | A        | ASN        | ND2        | 50         | C        | ASN        | OD1        | 2.83 |
| <b>230</b> | <b>A</b> | <b>ARG</b> | <b>NH2</b> | 6          | B        | ASP        | OD1        | 3.44 |
| <b>230</b> | <b>A</b> | <b>ARG</b> | <b>NH2</b> | 6          | B        | ASP        | OD1        | 3.44 |
| 406        | A        | TYR        | OH         | 16         | B        | HIS        | NE2        | 2.78 |
| 543        | A        | LYS        | NZ         | 117        | C        | GLU        | OE1        | 3.17 |
| 543        | A        | LYS        | NZ         | 117        | C        | GLU        | OE2        | 3.37 |
| <b>567</b> | <b>A</b> | <b>THR</b> | <b>OG1</b> | <b>140</b> | <b>C</b> | <b>GLU</b> | <b>OE2</b> | 2.85 |
| 16         | B        | HIS        | NE2        | 406        | A        | TYR        | OH         | 2.78 |
| 50         | C        | ASN        | OD1        | 209        | A        | ASN        | ND2        | 2.83 |
| 50         | C        | ASN        | OD1        | 209        | A        | ASN        | ND2        | 2.83 |

Pos, Position; Res, Residue; Dd-a, Distance between donor atom and acceptor atom; Red colored residues are hot residues; Green color indicates sustained bonds after simulation; Bold residues are sustained residues after simulation.

**Table S6C:** Protein-Protein Hydrophobic Interactions from complex 1

| Before Simulation                        |            |          |           |            |          |
|------------------------------------------|------------|----------|-----------|------------|----------|
| Protein-Protein Hydrophobic Interactions |            |          |           |            |          |
| Position                                 | Residue    | Chain    | Position  | Residue    | Chain    |
| 8                                        | PRO        | B        | 39        | TYR        | C        |
| 9                                        | PRO        | B        | 31        | LEU        | C        |
| 88                                       | TYR        | A        | 77        | ILE        | C        |
| <b>183</b>                               | <b>PHE</b> | <b>A</b> | <b>59</b> | <b>LEU</b> | <b>C</b> |

|     |     |   |     |     |   |
|-----|-----|---|-----|-----|---|
| 183 | PHE | A | 65  | TRP | C |
| 183 | PHE | A | 66  | PHE | C |
| 301 | TYR | A | 2   | VAL | B |
| 303 | TRP | A | 19  | PRO | B |
| 354 | PHE | A | 2   | VAL | B |
| 380 | TYR | A | 2   | VAL | B |
| 404 | LEU | A | 14  | PRO | B |
| 426 | ILE | A | 14  | PRO | B |
| 428 | LEU | A | 14  | PRO | B |
| 568 | MET | A | 139 | PRO | C |
| 569 | LEU | A | 137 | PHE | C |
| 588 | ALA | A | 137 | PHE | C |
| 591 | ALA | A | 137 | PHE | C |

**After Simulation**

**Protein-Protein Hydrophobic Interactions**

| Position | Residue | Chain | Position | Residue | Chain |
|----------|---------|-------|----------|---------|-------|
| 183      | PHE     | A     | 59       | LEU     | C     |
| 303      | TRP     | A     | 19       | PRO     | B     |
| 356      | ALA     | A     | 2        | VAL     | B     |
| 380      | TYR     | A     | 14       | PRO     | B     |
| 380      | TYR     | A     | 2        | VAL     | B     |
| 402      | ILE     | A     | 14       | PRO     | B     |
| 428      | LEU     | A     | 14       | PRO     | B     |
| 568      | MET     | A     | 139      | PRO     | C     |

Red colored residues are hot residues; Green color indicates sustain bond after simulation.

**Table S6D:** Protein-Protein Ionic Interactions from complex 1

| <b>Before Simulation</b>                  |         |       |          |         |       |
|-------------------------------------------|---------|-------|----------|---------|-------|
| <b>Protein-Protein Ionic Interactions</b> |         |       |          |         |       |
| Position                                  | Residue | Chain | Position | Residue | Chain |
| 230                                       | ARG     | A     | 56       | ASP     | C     |
| 230                                       | ARG     | A     | 6        | ASP     | B     |
| 231                                       | GLU     | A     | 21       | ARG     | B     |
| 231                                       | GLU     | A     | 42       | ARG     | C     |
| 253                                       | ASP     | A     | 21       | ARG     | B     |
| 304                                       | ARG     | A     | 6        | ASP     | B     |
| 334                                       | GLU     | A     | 1        | HIS     | B     |
| 358                                       | GLU     | A     | 1        | HIS     | B     |
| 358                                       | GLU     | A     | 15       | LYS     | B     |

| <b>407</b>                                | GLU            | A            | <b>15</b>       | <b>LYS</b>     | <b>B</b>     |
|-------------------------------------------|----------------|--------------|-----------------|----------------|--------------|
| <b>522</b>                                | ARG            | A            | 117             | GLU            | C            |
| <b>543</b>                                | <b>LYS</b>     | <b>A</b>     | 140             | GLU            | C            |
| <b>565</b>                                | <b>ASP</b>     | <b>A</b>     | <b>164</b>      | <b>LYS</b>     | <b>C</b>     |
| <b>After Simulation</b>                   |                |              |                 |                |              |
| <b>Protein-Protein Ionic Interactions</b> |                |              |                 |                |              |
| <b>Position</b>                           | <b>Residue</b> | <b>Chain</b> | <b>Position</b> | <b>Residue</b> | <b>Chain</b> |
| <b>21</b>                                 | ARG            | B            | 46              | LYS            | C            |
| <b>185</b>                                | <b>ARG</b>     | <b>A</b>     | <b>47</b>       | <b>ASP</b>     | <b>C</b>     |
| <b>230</b>                                | <b>ARG</b>     | <b>A</b>     | <b>6</b>        | <b>ASP</b>     | <b>B</b>     |
| <b>231</b>                                | <b>GLU</b>     | <b>A</b>     | <b>21</b>       | <b>ARG</b>     | <b>B</b>     |
| <b>304</b>                                | <b>ARG</b>     | <b>A</b>     | 17              | ASP            | B            |
| <b>334</b>                                | <b>GLU</b>     | <b>A</b>     | <b>1</b>        | <b>HIS</b>     | <b>B</b>     |
| <b>334</b>                                | GLU            | A            | 16              | HIS            | B            |
| <b>543</b>                                | <b>LYS</b>     | <b>A</b>     | 117             | GLU            | C            |
| <b>565</b>                                | <b>ASP</b>     | <b>A</b>     | <b>164</b>      | <b>LYS</b>     | <b>C</b>     |

Red colored residues are hot residues; Green color indicates sustained bonds after simulation; Bold residues are sustained residues after simulation.

**Table S6E:** Cation-Pi Interactions within 6 Angstroms from complex 1.

| <b>Before Simulation</b>                         |                |              |                 |                |              |                      |              |
|--------------------------------------------------|----------------|--------------|-----------------|----------------|--------------|----------------------|--------------|
| <b>Cation-Pi Interactions within 6 Angstroms</b> |                |              |                 |                |              |                      |              |
| <b>Position</b>                                  | <b>Residue</b> | <b>Chain</b> | <b>Position</b> | <b>Residue</b> | <b>Chain</b> | <b>D (cation-pi)</b> | <b>Angle</b> |
| <b>66</b>                                        | <b>PHE</b>     | <b>C</b>     | <b>159</b>      | <b>LYS</b>     | <b>A</b>     | 4.06                 | 121.59       |
| <b>279</b>                                       | TYR            | A            | 21              | ARG            | B            | 5.75                 | 75.47        |
| <b>After Simulation</b>                          |                |              |                 |                |              |                      |              |
| <b>Cation-Pi Interactions within 6 Angstroms</b> |                |              |                 |                |              |                      |              |
| <b>Position</b>                                  | <b>Residue</b> | <b>Chain</b> | <b>Position</b> | <b>Residue</b> | <b>Chain</b> | <b>D (cation-pi)</b> | <b>Angle</b> |
| <b>66</b>                                        | <b>PHE</b>     | <b>C</b>     | <b>138</b>      | <b>ARG</b>     | <b>A</b>     | 4.21                 | 17.57        |
| <b>406</b>                                       | TYR            | A            | <b>15</b>       | <b>LYS</b>     | <b>B</b>     | 5.96                 | 148.06       |

D (cation-pi), Distance between two chains; Red colored residues are hot residues; Bold residues are sustained residues after simulation.

**Table S6F:** Protein-Protein Aromatic-Sulphur Interactions from complex 1

| Before Simulation                                      |         |       |          |         |       |                     |       |
|--------------------------------------------------------|---------|-------|----------|---------|-------|---------------------|-------|
| Protein-Protein Aromatic-Sulphur Interactions          |         |       |          |         |       |                     |       |
| NO PROTEIN-PROTEIN AROMATIC-SULPHUR INTERACTIONS FOUND |         |       |          |         |       |                     |       |
| After Simulation                                       |         |       |          |         |       |                     |       |
| Protein-Protein Aromatic-Sulphur Interactions          |         |       |          |         |       |                     |       |
| Position                                               | Residue | Chain | Position | Residue | Chain | D(Centroid-Sulphur) | Angle |
| 137                                                    | PHE     | C     | 568      | MET     | A     | 5.10                | 52.38 |

D(Centroid-Sulphur), Distance between two chains

**Table S6G:** Protein-Protein Main Chain-Main Chain Hydrogen Bonds from complex 2

| Before Simulation                                       |       |     |      |          |       |     |      |      |
|---------------------------------------------------------|-------|-----|------|----------|-------|-----|------|------|
| Protein-Protein Main Chain-Main Chain Hydrogen Bonds    |       |     |      |          |       |     |      |      |
| No Protein-Protein Main Chain-Main Chain Hydrogen Bonds |       |     |      |          |       |     |      |      |
| After Simulation                                        |       |     |      |          |       |     |      |      |
| Protein-Protein Main Chain-Main Chain Hydrogen Bonds    |       |     |      |          |       |     |      |      |
| DONOR                                                   |       |     |      | ACCEPTOR |       |     |      |      |
| POS                                                     | CHAIN | RES | ATOM | POS      | CHAIN | RES | ATOM | Dd-a |
| 164                                                     | C     | LYS | N    | 567      | A     | THR | O    | 3.11 |

Pos, Position; Res, Residue; Dd-a, Distance between donor atom and acceptor atom; Red colored residues are hot residues.

**Table S6H:** Protein-Protein Main Chain-Side Chain Hydrogen Bonds from complex 2

| Before Simulation                                    |       |     |      |          |       |     |      |      |
|------------------------------------------------------|-------|-----|------|----------|-------|-----|------|------|
| Protein-Protein Main Chain-Side Chain Hydrogen Bonds |       |     |      |          |       |     |      |      |
| DONOR                                                |       |     |      | ACCEPTOR |       |     |      |      |
| POS                                                  | CHAIN | RES | ATOM | POS      | CHAIN | RES | ATOM | Dd-a |
| 62                                                   | A     | SER | OG   | 72       | C     | PRO | O    | 3.18 |
| 86                                                   | A     | ASP | OD2  | 71       | C     | ASN | O    | 3.46 |
| 86                                                   | A     | ASP | OD2  | 71       | C     | ASN | O    | 3.46 |
| 110                                                  | A     | ASP | OD2  | 63       | C     | CYS | O    | 2.78 |
| 110                                                  | A     | ASP | OD2  | 63       | C     | CYS | O    | 2.78 |
| 134                                                  | A     | HIS | NE2  | 63       | C     | CYS | O    | 3.19 |
| 134                                                  | A     | HIS | ND1  | 64       | C     | THR | O    | 3.17 |
| 134                                                  | A     | HIS | ND1  | 65       | C     | TRP | O    | 2.68 |
| 134                                                  | A     | HIS | NE2  | 65       | C     | TRP | O    | 2.05 |
| 134                                                  | A     | HIS | NE2  | 68       | C     | VAL | O    | 3.08 |
| 159                                                  | A     | LYS | NZ   | 65       | C     | TRP | O    | 3.4  |

|     |   |     |     |     |   |     |     |      |
|-----|---|-----|-----|-----|---|-----|-----|------|
| 159 | A | LYS | NZ  | 66  | C | PHE | O   | 3.37 |
| 207 | A | GLN | OE1 | 53  | C | GLN | O   | 2.01 |
| 207 | A | GLN | OE1 | 53  | C | GLN | O   | 2.01 |
| 567 | A | THR | N   | 140 | C | GLU | OE1 | 3.34 |
| 567 | A | THR | N   | 140 | C | GLU | OE2 | 1.63 |
| 568 | A | MET | N   | 140 | C | GLU | OE2 | 3    |
| 65  | C | TRP | N   | 134 | A | HIS | NE2 | 2.92 |
| 66  | C | PHE | N   | 134 | A | HIS | ND1 | 3.36 |
| 116 | C | ASN | ND2 | 544 | A | GLY | O   | 2.47 |
| 116 | C | ASN | ND2 | 544 | A | GLY | O   | 2.47 |
| 140 | C | GLU | OE1 | 565 | A | ASP | O   | 3.12 |
| 140 | C | GLU | OE1 | 565 | A | ASP | O   | 3.12 |
| 140 | C | GLU | OE2 | 565 | A | ASP | O   | 3.5  |
| 140 | C | GLU | OE2 | 565 | A | ASP | O   | 3.5  |

**After Simulation**

| <b>Protein-Protein Main Chain-Side Chain Hydrogen Bonds</b> |              |            |             |                 |              |            |             |             |
|-------------------------------------------------------------|--------------|------------|-------------|-----------------|--------------|------------|-------------|-------------|
| <b>DONOR</b>                                                |              |            |             | <b>ACCEPTOR</b> |              |            |             |             |
| <b>POS</b>                                                  | <b>CHAIN</b> | <b>RES</b> | <b>ATOM</b> | <b>POS</b>      | <b>CHAIN</b> | <b>RES</b> | <b>ATOM</b> | <b>Dd-a</b> |
| 522                                                         | A            | ARG        | NE          | 114             | C            | ILE        | O           | 3.4         |
| 522                                                         | A            | ARG        | NH2         | 115             | C            | PRO        | O           | 3.02        |
| 522                                                         | A            | ARG        | NH2         | 115             | C            | PRO        | O           | 3.02        |
| 522                                                         | A            | ARG        | NH1         | 135             | C            | THR        | O           | 3           |
| 522                                                         | A            | ARG        | NH1         | 135             | C            | THR        | O           | 3           |
| 522                                                         | A            | ARG        | NH1         | 137             | C            | PHE        | O           | 3.04        |
| 522                                                         | A            | ARG        | NH1         | 137             | C            | PHE        | O           | 3.04        |
| 522                                                         | A            | ARG        | NH2         | 137             | C            | PHE        | O           | 3.44        |
| 522                                                         | A            | ARG        | NH2         | 137             | C            | PHE        | O           | 3.44        |
| 50                                                          | C            | ASN        | N           | 231             | A            | GLU        | OE2         | 2.94        |
| 137                                                         | C            | PHE        | N           | 546             | A            | GLU        | OE2         | 2.91        |
| 161                                                         | C            | SER        | OG          | 569             | A            | LEU        | O           | 3.47        |
| 161                                                         | C            | SER        | N           | 570             | A            | HIS        | ND1         | 3.06        |

Pos, Position; Res, Residue; Dd-a, Distance between donor atom and acceptor atom; Red colored residues are hot residues.

**Table S6I:** Protein-Protein Side Chain-Side Chain Hydrogen Bonds from complex 2

| <b>Before Simulation</b>                                    |              |            |             |                 |              |            |             |             |
|-------------------------------------------------------------|--------------|------------|-------------|-----------------|--------------|------------|-------------|-------------|
| <b>Protein-Protein Side Chain-Side Chain Hydrogen Bonds</b> |              |            |             |                 |              |            |             |             |
| <b>DONOR</b>                                                |              |            |             | <b>ACCEPTOR</b> |              |            |             |             |
| <b>POS</b>                                                  | <b>CHAIN</b> | <b>RES</b> | <b>ATOM</b> | <b>POS</b>      | <b>CHAIN</b> | <b>RES</b> | <b>ATOM</b> | <b>Dd-a</b> |

|     |   |     |     |     |   |     |     |      |
|-----|---|-----|-----|-----|---|-----|-----|------|
| 207 | A | GLN | OE1 | 53  | C | GLN | NE2 | 2.83 |
| 207 | A | GLN | OE1 | 53  | C | GLN | NE2 | 2.83 |
| 230 | A | ARG | NH2 | 56  | C | ASP | OD2 | 2.5  |
| 230 | A | ARG | NH2 | 56  | C | ASP | OD2 | 2.5  |
| 231 | A | GLU | OE1 | 53  | C | GLN | OE1 | 3.09 |
| 231 | A | GLU | OE1 | 53  | C | GLN | OE1 | 3.09 |
| 231 | A | GLU | OE1 | 53  | C | GLN | NE2 | 2.7  |
| 231 | A | GLU | OE1 | 53  | C | GLN | NE2 | 2.7  |
| 231 | A | GLU | OE2 | 53  | C | GLN | OE1 | 1.69 |
| 231 | A | GLU | OE2 | 53  | C | GLN | OE1 | 1.69 |
| 231 | A | GLU | OE2 | 53  | C | GLN | NE2 | 2.24 |
| 231 | A | GLU | OE2 | 53  | C | GLN | NE2 | 2.24 |
| 522 | A | ARG | NH1 | 117 | C | GLU | OE1 | 2.98 |
| 522 | A | ARG | NH1 | 117 | C | GLU | OE1 | 2.98 |
| 546 | A | GLU | OE2 | 116 | C | ASN | ND2 | 3.28 |
| 546 | A | GLU | OE2 | 116 | C | ASN | ND2 | 3.28 |
| 567 | A | THR | OG1 | 140 | C | GLU | OE1 | 2.36 |
| 567 | A | THR | OG1 | 140 | C | GLU | OE2 | 2.27 |
| 53  | C | GLN | NE2 | 207 | A | GLN | OE1 | 2.83 |
| 53  | C | GLN | NE2 | 207 | A | GLN | OE1 | 2.83 |
| 53  | C | GLN | OE1 | 231 | A | GLU | OE1 | 3.09 |
| 53  | C | GLN | OE1 | 231 | A | GLU | OE1 | 3.09 |
| 53  | C | GLN | OE1 | 231 | A | GLU | OE2 | 1.69 |
| 53  | C | GLN | OE1 | 231 | A | GLU | OE2 | 1.69 |
| 53  | C | GLN | NE2 | 231 | A | GLU | OE1 | 2.7  |
| 53  | C | GLN | NE2 | 231 | A | GLU | OE1 | 2.7  |
| 53  | C | GLN | NE2 | 231 | A | GLU | OE2 | 2.24 |
| 53  | C | GLN | NE2 | 231 | A | GLU | OE2 | 2.24 |
| 113 | C | THR | OG1 | 546 | A | GLU | OE1 | 3.48 |
| 116 | C | ASN | ND2 | 546 | A | GLU | OE2 | 3.28 |
| 116 | C | ASN | ND2 | 546 | A | GLU | OE2 | 3.28 |
| 116 | C | ASN | OD1 | 568 | A | MET | SD  | 1.15 |
| 116 | C | ASN | OD1 | 568 | A | MET | SD  | 1.15 |
| 116 | C | ASN | ND2 | 568 | A | MET | SD  | 2.66 |
| 116 | C | ASN | ND2 | 568 | A | MET | SD  | 2.66 |

After Simulation

Protein-Protein Side Chain-Side Chain Hydrogen Bonds

DONOR

ACCEPTOR

| POS | CHAIN | RES | ATOM | POS | CHAIN | RES | ATOM | Dd-a |
|-----|-------|-----|------|-----|-------|-----|------|------|
| 88  | A     | TYR | OH   | 73  | C     | ASP | OD1  | 2.8  |
| 136 | A     | GLN | OE1  | 61  | C     | ASN | ND2  | 3.13 |
| 136 | A     | GLN | OE1  | 61  | C     | ASN | ND2  | 3.13 |
| 136 | A     | GLN | NE2  | 61  | C     | ASN | ND2  | 3.27 |
| 136 | A     | GLN | NE2  | 61  | C     | ASN | ND2  | 3.27 |
| 138 | A     | ARG | NH1  | 71  | C     | ASN | OD1  | 3.04 |
| 138 | A     | ARG | NH1  | 71  | C     | ASN | OD1  | 3.04 |
| 185 | A     | ARG | NH2  | 50  | C     | ASN | OD1  | 3.37 |
| 185 | A     | ARG | NH2  | 50  | C     | ASN | OD1  | 3.37 |
| 185 | A     | ARG | NH2  | 67  | C     | HIS | ND1  | 2.83 |
| 185 | A     | ARG | NH2  | 67  | C     | HIS | ND1  | 2.83 |
| 231 | A     | GLU | OE1  | 49  | C     | ASN | ND2  | 3.01 |
| 231 | A     | GLU | OE1  | 49  | C     | ASN | ND2  | 3.01 |
| 231 | A     | GLU | OE1  | 50  | C     | ASN | ND2  | 2.99 |
| 231 | A     | GLU | OE1  | 50  | C     | ASN | ND2  | 2.99 |
| 495 | A     | LYS | NZ   | 93  | C     | GLN | OE1  | 2.85 |
| 496 | A     | ASN | ND2  | 93  | C     | GLN | OE1  | 2.94 |
| 496 | A     | ASN | ND2  | 93  | C     | GLN | OE1  | 2.94 |
| 522 | A     | ARG | NE   | 116 | C     | ASN | OD1  | 2.69 |
| 522 | A     | ARG | NH2  | 116 | C     | ASN | OD1  | 3.03 |
| 522 | A     | ARG | NH2  | 116 | C     | ASN | OD1  | 3.03 |
| 567 | A     | THR | OG1  | 140 | C     | GLU | OE2  | 2.73 |
| 570 | A     | HIS | ND1  | 161 | C     | SER | OG   | 3.44 |
| 49  | C     | ASN | ND2  | 231 | A     | GLU | OE1  | 3.01 |
| 49  | C     | ASN | ND2  | 231 | A     | GLU | OE1  | 3.01 |
| 50  | C     | ASN | ND2  | 231 | A     | GLU | OE1  | 2.99 |
| 50  | C     | ASN | ND2  | 231 | A     | GLU | OE1  | 2.99 |
| 61  | C     | ASN | ND2  | 136 | A     | GLN | OE1  | 3.13 |
| 61  | C     | ASN | ND2  | 136 | A     | GLN | OE1  | 3.13 |
| 61  | C     | ASN | ND2  | 136 | A     | GLN | NE2  | 3.27 |
| 61  | C     | ASN | ND2  | 136 | A     | GLN | NE2  | 3.27 |
| 93  | C     | GLN | OE1  | 496 | A     | ASN | ND2  | 2.94 |
| 93  | C     | GLN | OE1  | 496 | A     | ASN | ND2  | 2.94 |
| 116 | C     | ASN | OD1  | 568 | A     | MET | SD   | 3.68 |
| 116 | C     | ASN | OD1  | 568 | A     | MET | SD   | 3.68 |
| 116 | C     | ASN | ND2  | 568 | A     | MET | SD   | 3.32 |



|            |          |            |            |            |          |            |           |      |
|------------|----------|------------|------------|------------|----------|------------|-----------|------|
| <b>116</b> | <b>C</b> | <b>ASN</b> | <b>ND2</b> | <b>568</b> | <b>A</b> | <b>MET</b> | <b>SD</b> | 3.32 |
| <b>161</b> | C        | SER        | OG         | 570        | A        | HIS        | ND1       | 3.44 |

Pos, Position; Res, Residue; Dd-a, Distance between donor atom and acceptor atom; Red colored residues are hot residues; Green color indicates sustained bonds after simulation; Bold residues are sustained residues after simulation.

**Table S6J:** Protein-Protein Hydrophobic Interactions from complex 2

| Before Simulation                        |            |          |          |         |       |
|------------------------------------------|------------|----------|----------|---------|-------|
| Protein-Protein Hydrophobic Interactions |            |          |          |         |       |
| Position                                 | Residue    | Chain    | Position | Residue | Chain |
| <b>88</b>                                | TYR        | A        | 77       | ILE     | C     |
| <b>183</b>                               | PHE        | A        | 59       | LEU     | C     |
| <b>183</b>                               | PHE        | A        | 65       | TRP     | C     |
| <b>183</b>                               | PHE        | A        | 66       | PHE     | C     |
| <b>568</b>                               | <b>MET</b> | <b>A</b> | 139      | PRO     | C     |
| <b>569</b>                               | LEU        | A        | 137      | PHE     | C     |
| <b>588</b>                               | ALA        | A        | 137      | PHE     | C     |
| <b>591</b>                               | ALA        | A        | 137      | PHE     | C     |
| After Simulation                         |            |          |          |         |       |
| Protein-Protein Hydrophobic Interactions |            |          |          |         |       |
| Position                                 | Residue    | Chain    | Position | Residue | Chain |
| <b>183</b>                               | PHE        | A        | 66       | PHE     | C     |
| <b>474</b>                               | ILE        | A        | 91       | VAL     | C     |
| <b>520</b>                               | LEU        | A        | 115      | PRO     | C     |
| <b>568</b>                               | <b>MET</b> | <b>A</b> | 137      | PHE     | C     |
| <b>568</b>                               | MET        | A        | 163      | PRO     | C     |

Bold residues are sustained residues after simulation.

**Table S6K:** Protein-Protein Ionic Interactions from complex 2

| Before Simulation                  |            |          |            |            |          |
|------------------------------------|------------|----------|------------|------------|----------|
| Protein-Protein Ionic Interactions |            |          |            |            |          |
| Position                           | Residue    | Chain    | Position   | Residue    | Chain    |
| <b>230</b>                         | <b>ARG</b> | <b>A</b> | 56         | ASP        | C        |
| <b>231</b>                         | GLU        | A        | 42         | ARG        | C        |
| <b>522</b>                         | ARG        | A        | 117        | GLU        | C        |
| <b>543</b>                         | <b>LYS</b> | <b>A</b> | 140        | GLU        | C        |
| <b>565</b>                         | ASP        | A        | <b>164</b> | <b>LYS</b> | <b>C</b> |
| After Simulation                   |            |          |            |            |          |
| Protein-Protein Ionic Interactions |            |          |            |            |          |
| Position                           | Residue    | Chain    | Position   | Residue    | Chain    |
| <b>159</b>                         | <b>LYS</b> | <b>A</b> | 56         | ASP        | C        |
| <b>543</b>                         | <b>LYS</b> | <b>A</b> | 117        | GLU        | C        |

Red coloured residues are hot residues; Bold residues are sustained residues after simulation.

**Table S6L:** Protein-Protein Cation-Pi Interactions from complex 2

| Before Simulation                      |            |          |            |            |          |              |        |
|----------------------------------------|------------|----------|------------|------------|----------|--------------|--------|
| Protein-Protein Cation-Pi Interactions |            |          |            |            |          |              |        |
| Position                               | Residue    | Chain    | Position   | Residue    | Chain    | D(cation-Pi) | Angle  |
| <b>66</b>                              | <b>PHE</b> | <b>C</b> | <b>159</b> | <b>LYS</b> | <b>A</b> | 4.06         | 121.59 |
| After Simulation                       |            |          |            |            |          |              |        |
| Protein-Protein Cation-Pi Interactions |            |          |            |            |          |              |        |
| Position                               | Residue    | Chain    | Position   | Residue    | Chain    | D(cation-Pi) | Angle  |
| <b>66</b>                              | <b>PHE</b> | <b>C</b> | <b>185</b> | <b>ARG</b> | <b>A</b> | 3.89         | 39.7   |

D (cation-pi), Distance between two chains; Red colored residues are hot residues; Bold residues are sustained residues after simulation.

**Table S6M:** Protein-Protein Aromatic-Aromatic Interactions from complex 2

| Before Simulation                                       |            |          |           |            |          |              |       |
|---------------------------------------------------------|------------|----------|-----------|------------|----------|--------------|-------|
| Protein-Protein Aromatic-Aromatic Interactions          |            |          |           |            |          |              |       |
| NO PROTEIN-PROTEIN AROMATIC-AROMATIC INTERACTIONS FOUND |            |          |           |            |          |              |       |
| After Simulation                                        |            |          |           |            |          |              |       |
| Protein-Protein Aromatic-Aromatic Interactions          |            |          |           |            |          |              |       |
| Position                                                | Residue    | Chain    | Position  | Residue    | Chain    | D(cation-Pi) | Angle |
| <b>183</b>                                              | <b>PHE</b> | <b>A</b> | <b>66</b> | <b>PHE</b> | <b>C</b> | 5.77         | 51.71 |

D(cation-pi): Distance between two chains

**Table S6N:** Protein-Protein Main Chain-Side Chain Hydrogen Bonds from complex 3

| Before Simulation                                    |          |            |            |            |          |            |           |             |
|------------------------------------------------------|----------|------------|------------|------------|----------|------------|-----------|-------------|
| Protein-Protein Main Chain-Side Chain Hydrogen Bonds |          |            |            |            |          |            |           |             |
| DONOR                                                |          |            |            | ACCEPTOR   |          |            |           |             |
| POS                                                  | CHAIN    | RES        | ATOM       | POS        | CHAIN    | RES        | ATOM      | Dd-a        |
| <b>331</b>                                           | <b>A</b> | <b>ASN</b> | <b>ND2</b> | <b>1</b>   | <b>B</b> | <b>HIS</b> | <b>O</b>  | 2.33        |
| <b>331</b>                                           | <b>A</b> | <b>ASN</b> | <b>ND2</b> | <b>1</b>   | <b>B</b> | <b>HIS</b> | <b>O</b>  | 2.33        |
| <b>4</b>                                             | <b>B</b> | <b>GLY</b> | <b>N</b>   | <b>301</b> | <b>A</b> | <b>TYR</b> | <b>OH</b> | 3.4         |
| After Simulation                                     |          |            |            |            |          |            |           |             |
| Protein-Protein Main Chain-Side Chain Hydrogen Bonds |          |            |            |            |          |            |           |             |
| DONOR                                                |          |            |            | ACCEPTOR   |          |            |           |             |
| POS                                                  | CHAIN    | RES        | ATOM       | POS        | CHAIN    | RES        | ATOM      | Dd-a        |
| <b>303</b>                                           | <b>A</b> | <b>TRP</b> | <b>NE1</b> | <b>1</b>   | <b>B</b> | <b>HIS</b> | <b>O</b>  | 3.27        |
| <b>331</b>                                           | <b>A</b> | <b>ASN</b> | <b>ND2</b> | <b>1</b>   | <b>B</b> | <b>HIS</b> | <b>O</b>  | 3.47        |
| <b>331</b>                                           | <b>A</b> | <b>ASN</b> | <b>ND2</b> | <b>1</b>   | <b>B</b> | <b>HIS</b> | <b>O</b>  | 3.47        |
| <b>331</b>                                           | <b>A</b> | <b>ASN</b> | <b>ND2</b> | <b>2</b>   | <b>B</b> | <b>VAL</b> | <b>O</b>  | <b>3.08</b> |

|            |   |     |     |          |          |            |          |             |
|------------|---|-----|-----|----------|----------|------------|----------|-------------|
| <b>331</b> | A | ASN | ND2 | <b>2</b> | <b>B</b> | <b>VAL</b> | <b>O</b> | <b>3.08</b> |
| <b>382</b> | A | CYS | SG  | 14       | B        | PRO        | O        | 3.55        |
| <b>1</b>   | B | HIS | N   | 334      | A        | GLU        | OE1      | 3.38        |
| <b>1</b>   | B | HIS | N   | 334      | A        | GLU        | OE2      | 3.33        |
| <b>1</b>   | B | HIS | N   | 358      | A        | GLU        | OE2      | 2.95        |
| <b>4</b>   | B | GLY | N   | 331      | A        | ASN        | OD1      | 3.41        |
| <b>5</b>   | B | GLY | N   | 301      | A        | TYR        | OH       | 2.72        |

Pos, Position; Res, Residue; Dd-a, Distance between donor atom and acceptor atom; Red colored residues are hot residues; Green color indicates sustained bonds after simulation; Bold residues are sustained residues after simulation.

**Table S6O:** Protein-Protein Side Chain-Side Chain Hydrogen Bonds from complex 3

| Before Simulation                                    |          |            |           |          |       |     |      |      |
|------------------------------------------------------|----------|------------|-----------|----------|-------|-----|------|------|
| Protein-Protein Side Chain-Side Chain Hydrogen Bonds |          |            |           |          |       |     |      |      |
| DONOR                                                |          |            |           | ACCEPTOR |       |     |      |      |
| POS                                                  | CHAIN    | RES        | ATOM      | POS      | CHAIN | RES | ATOM | Dd-a |
| <b>279</b>                                           | A        | TYR        | OH        | 6        | B     | ASP | OD1  | 3.34 |
| <b>279</b>                                           | A        | TYR        | OH        | 6        | B     | ASP | OD2  | 3.15 |
| <b>358</b>                                           | A        | GLU        | OE1       | 1        | B     | HIS | ND1  | 3.06 |
| <b>358</b>                                           | A        | GLU        | OE1       | 1        | B     | HIS | ND1  | 3.06 |
| <b>1</b>                                             | B        | HIS        | ND1       | 358      | A     | GLU | OE1  | 3.06 |
| <b>7</b>                                             | <b>B</b> | <b>X</b>   | <b>OH</b> | 380      | A     | TYR | OH   | 3.07 |
| <b>15</b>                                            | <b>B</b> | <b>LYS</b> | <b>NZ</b> | 383      | A     | ASN | OD1  | 2.99 |
| <b>15</b>                                            | <b>B</b> | <b>LYS</b> | <b>NZ</b> | 383      | A     | ASN | ND2  | 2.63 |
| <b>21</b>                                            | B        | ARG        | NH2       | 231      | A     | GLU | OE1  | 2.1  |
| <b>21</b>                                            | B        | ARG        | NH2       | 231      | A     | GLU | OE1  | 2.1  |
| <b>21</b>                                            | B        | ARG        | NH1       | 279      | A     | TYR | OH   | 3.38 |
| <b>21</b>                                            | B        | ARG        | NH1       | 279      | A     | TYR | OH   | 3.38 |

  

| After Simulation                                     |          |          |           |          |       |     |      |      |
|------------------------------------------------------|----------|----------|-----------|----------|-------|-----|------|------|
| Protein-Protein Side Chain-Side Chain Hydrogen Bonds |          |          |           |          |       |     |      |      |
| DONOR                                                |          |          |           | ACCEPTOR |       |     |      |      |
| POS                                                  | CHAIN    | RES      | ATOM      | POS      | CHAIN | RES | ATOM | Dd-a |
| <b>378</b>                                           | A        | HIS      | NE2       | 7        | B     | X   | OH   | 2.83 |
| <b>7</b>                                             | <b>B</b> | <b>X</b> | <b>OH</b> | 378      | A     | HIS | NE2  | 2.83 |

Pos, Position; Res, Residue; Dd-a, Distance between donor atom and acceptor atom; Red colored residues are hot residues; Green color indicates sustained bonds after simulation; Bold residues are sustained residues after simulation.

**Table S6P:** Protein-Protein Hydrophobic Interactions from complex 3

| Before Simulation                        |         |       |          |            |          |
|------------------------------------------|---------|-------|----------|------------|----------|
| Protein-Protein Hydrophobic Interactions |         |       |          |            |          |
| Position                                 | Residue | Chain | Position | Residue    | Chain    |
| <b>301</b>                               | TYR     | A     | <b>2</b> | <b>VAL</b> | <b>B</b> |
| <b>303</b>                               | TRP     | A     | 19       | PRO        | B        |

| 354                                      | PHE     | A     | 2        | VAL     | B     |
|------------------------------------------|---------|-------|----------|---------|-------|
| 380                                      | TYR     | A     | 2        | VAL     | B     |
| 404                                      | LEU     | A     | 14       | PRO     | B     |
| 426                                      | ILE     | A     | 14       | PRO     | B     |
| 428                                      | LEU     | A     | 14       | PRO     | B     |
| After Simulation                         |         |       |          |         |       |
| Protein-Protein Hydrophobic Interactions |         |       |          |         |       |
| Position                                 | Residue | Chain | Position | Residue | Chain |
| 380                                      | TYR     | A     | 14       | PRO     | B     |
| 380                                      | TYR     | A     | 2        | VAL     | B     |
| 402                                      | ILE     | A     | 12       | ALA     | B     |
| 404                                      | LEU     | A     | 14       | PRO     | B     |

Red colored residues are hot residues; Green color indicates sustain bond after simulation.

**Table S6Q:** Protein-Protein Ionic Interactions from complex 3

| Before Simulation                  |         |       |          |         |       |
|------------------------------------|---------|-------|----------|---------|-------|
| Protein-Protein Ionic Interactions |         |       |          |         |       |
| Position                           | Residue | Chain | Position | Residue | Chain |
| 230                                | ARG     | A     | 6        | ASP     | B     |
| 231                                | GLU     | A     | 21       | ARG     | B     |
| 253                                | ASP     | A     | 21       | ARG     | B     |
| 304                                | ARG     | A     | 6        | ASP     | B     |
| 334                                | GLU     | A     | 1        | HIS     | B     |
| 358                                | GLU     | A     | 1        | HIS     | B     |
| 358                                | GLU     | A     | 15       | LYS     | B     |
| 407                                | GLU     | A     | 15       | LYS     | B     |
| After Simulation                   |         |       |          |         |       |
| Protein-Protein Ionic Interactions |         |       |          |         |       |
| Position                           | Residue | Chain | Position | Residue | Chain |
| 230                                | ARG     | A     | 6        | ASP     | B     |
| 304                                | ARG     | A     | 17       | ASP     | B     |
| 334                                | GLU     | A     | 1        | HIS     | B     |
| 407                                | GLU     | A     | 16       | HIS     | B     |

Red colored residues are hot residues; Green color indicates sustained bonds after simulation; Bold residues are sustained residues after simulation.

**Table S6R:** Protein-Protein Cation-Pi Interactions from complex 3

| Before Simulation                      |         |       |          |         |       |              |       |
|----------------------------------------|---------|-------|----------|---------|-------|--------------|-------|
| Protein-Protein Cation-Pi Interactions |         |       |          |         |       |              |       |
| Position                               | Residue | Chain | Position | Residue | Chain | D(cation-Pi) | Angle |
| 279                                    | TYR     | A     | 21       | ARG     | B     | 5.75         | 75.47 |

After Simulation  
Protein-Protein Cation-Pi Interactions

NO PROTEIN-PROTEIN CATION-PI INTERACTIONS FOUND

D (cation-pi), Distance between two chain

| Complex       | Inter. Bet.   | H-Bond |    | Hydrophobic Interaction |    | Ionic Interaction |    | Cation - Pi Interaction |    | Aromatic - Aromatic Interaction |    | Aromatic - Sulphar Interaction |    | Total |    |
|---------------|---------------|--------|----|-------------------------|----|-------------------|----|-------------------------|----|---------------------------------|----|--------------------------------|----|-------|----|
|               |               | B.     | A. | B.                      | A. | B.                | A. | B.                      | A. | B.                              | A. | B.                             | A. | B.    | A. |
|               |               | MD     | MD | MD                      | MD | MD                | MD | MD                      | MD | MD                              | MD | MD                             | MD | MD    | MD |
|               | <i>Xa21</i>   | 15     | 14 | 7                       | 6  | 8                 | 5  | 1                       | 1  | 0                               | 0  | 0                              | 0  | 31    | 26 |
|               | <i>+Raxsn</i> |        |    |                         |    |                   |    |                         |    |                                 |    |                                |    |       |    |
| <b>Xa21</b>   | <i>Xa21</i>   | 60     | 17 | 8                       | 2  | 5                 | 3  | 1                       | 1  | 0                               | 0  | 0                              | 1  | 74    | 24 |
| <b>+Raxsn</b> | <i>+Os</i>    |        |    |                         |    |                   |    |                         |    |                                 |    |                                |    |       |    |
| <b>+Os</b>    | <i>Raxsn</i>  | 16     | 0  | 2                       | 0  | 0                 | 1  | 0                       | 0  | 0                               | 0  | 0                              | 0  | 18    | 1  |
|               | <i>+Os</i>    |        |    |                         |    |                   |    |                         |    |                                 |    |                                |    |       |    |
| <b>Xa21</b>   | <i>Xa21</i>   | 60     | 52 | 8                       | 5  | 5                 | 2  | 1                       | 1  | 0                               | 1  | 0                              | 0  | 74    | 79 |
| <b>+Os</b>    | <i>+Os</i>    |        |    |                         |    |                   |    |                         |    |                                 |    |                                |    |       |    |
| <b>Xa21</b>   | <i>Xa21</i>   | 15     | 13 | 7                       | 4  | 8                 | 4  | 1                       | 0  | 0                               | 0  | 0                              | 0  | 31    | 21 |
| <b>+Raxsn</b> | <i>+Raxsn</i> |        |    |                         |    |                   |    |                         |    |                                 |    |                                |    |       |    |

**Table S6S:** Summary of interactions between Xa21, RaxX21-sY and OsSERK2

Inter. Bet., Interactions Between; H-Bond, Hydrogen Bond; B. MD, Before Molecular Dynamics simulation; A. MD, After Molecular Dynamics simulation
